1 **CELL SPECIFIC REACTIVATION OF EPICARDIUM AT THE ORIGIN OF**  
2 **FIBRO-FATTY REMODELING OF THE ATRIAL MYOCARDIUM**

3  
4 **Running title: Suffee et al.; Epicardium and atrial cardiomyopathy**  
5

6 Nadine Suffee<sup>1,5</sup>, Thomas Moore-Morris<sup>2</sup>, Nathalie Mougenot<sup>3,5</sup>, Gilles Dilanian<sup>1,5</sup>, Myriam  
7 Berthet<sup>1,5</sup>, Bernd Jagla<sup>6</sup>, Julie Proukhnitzky<sup>1,5</sup>, Pascal Le Prince<sup>1,4,5</sup>, David A Tregouet<sup>1,5</sup>,  
8 Michel Pucéat<sup>2\*</sup>, Stéphane N Hatem<sup>1,4,5\*</sup>  
9

10 <sup>1</sup> Sorbonne universités, INSERM UMR\_S1166, Faculté de médecine UPMC, Paris, France

11 <sup>2</sup> Aix Marseille Univ, INSERM, MMG, U 1251, Marseille, France

12 <sup>3</sup> Sorbonne universités, INSERM UMR\_S28, Faculté de médecine UPMC, Paris, France

13 <sup>4</sup> Department of Cardiology, Assistance Publique - Hôpitaux de Paris, Pitié-Salpêtrière  
14 Hospital, Paris, France

15 <sup>5</sup> Institute of Cardiometabolism and Nutrition, ICAN, Paris, France

16 <sup>6</sup> Pasteur Institute UtechS CB & Hub de Bioinformatique et Biostatistiques, C3BI, Paris  
17

18 **\*MP and SNH joined senior authors**

19 **Correspondance:**

20 Stéphane Hatem

21 UMR\_S1166, Faculté de médecine

22 91, boulevard de l'hôpital

23 75013 Paris, France

24 Fax: +33 1 40 77 96 49

25 Telephone: +33 1 40 77 95 84

26 [stephane.hatem@upmc.fr](mailto:stephane.hatem@upmc.fr)

27

28 **Words count : 6278**

29

1    **Abstract**

2    Epicardium, the mesothelium covering the heart, is composed of multipotent cells and is  
3    reactivated following myocardial injury in adults. Herein, we provide evidence for activation  
4    of atrial epicardium in aged patients with diseased atria and in murine models of atrial  
5    remodeling. Epicardial activation contributed to fibro-fatty infiltration of sub-epicardium that  
6    contained a number of cells co-expressing markers of epicardial progenitors and fibroblasts.  
7    Indeed, using genetic lineage tracing of adult epicardium, we demonstrate the epicardial origin  
8    of fibroblasts within fibro-fatty infiltrates. A subpopulation of adult epicardial-derived cells  
9    (aEPDCs) expressing PDGFR $\alpha$ , niched in the sub-epicardium, were isolated and differentiated  
10   into myofibroblast in the presence of angiotensin-II. Furthermore, single cell RNA-seq analysis  
11   identified several clusters of aEPDCs and revealed transition from adipogenic to fibrogenic  
12   cells. In conclusion, a subset of aEPDCs, pre-programmed towards a specific cell fate,  
13   contributes to fibro-fatty infiltration of sub-epicardium of diseased atria.

14

15

## 1 **Introduction**

2 The epicardium plays a major role in the formation of embryonic heart. This outer mesothelial  
3 layer of the heart contains multipotent progenitors, giving rise to smooth muscle cells of  
4 coronary vessels as well as to cardiac fibroblasts that provide a stroma that drives formation  
5 and alignment of myocardial fibers<sup>1</sup>. The epicardium is quiescent in healthy adult heart, but can  
6 be reactivated following massive and acute injury. It thickens, expresses fetal genes, and  
7 triggers differentiation of epicardial progenitors that can migrate into subjacent myocardium.  
8 Hence, it has been shown that the epicardium can be a source of fibroblasts contributing to  
9 fibrosis of the adult ventricular myocardium in response to acute ischemia<sup>2</sup>. In addition, we and  
10 Yamaguchi *et al* have reported that atrial epicardial cells undergo epithelial-to-mesenchymal  
11 transition (EMT), delaminate from the epicardium and differentiate into adipocytes contributing  
12 to the accumulation of epicardial adipose tissue (EAT) both at the external face of the  
13 epicardium and in the sub-epicardium<sup>3,4</sup>.

14 In the atria, EAT is a common component of atrial histology. It is a source of free fatty  
15 acid and of adipokines that can regulate the metabolism of the redox state of neighboring  
16 myocardium<sup>5,6</sup>. However, both expansion and fibrotic remodeling of EAT are associated with  
17 an increased risk of atrial fibrillation (AF), the most frequent cardiac arrhythmia in clinical  
18 practice<sup>7</sup>. One mechanism linking fibro-fatty infiltration of the subepicardium and AF is that  
19 this remodeling process contributes to the electrical dissociation between subepicardium and  
20 subendocardium areas favoring focal fibrillation waves as recorded in patients with  
21 longstanding AF<sup>8,9</sup>. Hence, fibro fatty infiltration of the subepicardium is considered as an  
22 important determinant of AF substrate. However, the underlying biological mechanisms are  
23 still largely unknown.

24 The natriuretic peptide secreted by stretched atrial myocytes is a potent adipogenic  
25 factor for adult epicardium progenitor-derived cells (aEPDCs) which might favor EAT

1 expansion in the context of increased atrial workload<sup>4</sup>. EAT can contribute to the fibrotic  
2 remodeling of the subepicardium by secreting adipo-fibrokinases such as activin-A that freely  
3 diffuse into the neighboring myocardium<sup>10</sup>. In addition, the adipose tissue depot commonly  
4 seen in the subepicardium can be replaced by fibrosis through an immune process mediated by  
5 CD8<sup>+</sup> T lymphocytes<sup>11</sup>. Altogether these results suggest a balance between EAT expansion and  
6 fibrosis of the subepicardium.

7         In the present study, we tested the hypothesis that the atrial epicardium can be a source  
8 of fibroblasts contributing to the fibro-fatty infiltration of the subepicardium. We found that a  
9 subset of aEPDCs are programmed towards fibroblast or adipocyte differentiation, and  
10 contribute to fibro-fatty infiltration of the subepicardium in response to various stimuli. Our  
11 results provide novel insight into the role played by the epicardium in the slow process of atrial  
12 remodeling and the formation of AF substrate.

13

14

15

16

17

18

19

20

21

22

## 1 **Methods**

2 **Study approval.** All animal experiments were conformed to the Guide for the care and use of  
3 laboratory animals, according to the Directive 2010/63/EU of the European Parliament  
4 approved by the local committee of animal care (agreement A751315).

5 Human tissue samples were obtained from patients that had undergone heart surgery.  
6 Data and samples were obtained in accordance with French Law "loi Huriet-Sérusclat" and with  
7 the approval of the Ethical Committee (Comité de protection du personnel Ile-de-France VI) of  
8 Pitié-Salpêtrière Hospital non-opposition to the research was obtained from each patient.  
9 Personal Data treatment necessary to the research was declared to the National Commission for  
10 Data Protection and Liberties (CNIL-France) under the Data Protection Act number 78-17.  
11 Clinical parameters are indicated in Supplementary Table 1.

12 **Murine model.** Both, eight-week-old male mice and rats were maintained under 12 h light/ 12  
13 h dark cycle at constant temperature (21°C) with free access to food and water. Embryos were  
14 staged as E11.5 or E16.5 days. WT1Cre<sup>ERT2+/-</sup> and Rosa26<sup>tdTomato+/+</sup> on a C57BL/6J background  
15 were purchased from The Jackson laboratories (L'arbresle, France). WT1Cre<sup>ERT2+/-</sup> mice were  
16 bred with Rosa26<sup>tdT+/+</sup> mice as described previously<sup>4</sup>. In order to label adult epicardium, 6  
17 week-old WT1Cre<sup>ERT2+/-</sup>;Rosa26<sup>tdT+/-</sup> mice were administered tamoxifen (70mg/kg bw) for 5  
18 consecutive days. Wistar rats were purchased from Janvier (200-220 g, CERJ, Laval, France).  
19 WT1Cre<sup>ERT2+/-</sup>;Rosa26<sup>tdT+/-</sup> transgenic mice (n=10) and Wistar rats (n=50) were anesthetized  
20 with Isoflurane 2 %. Mice and rats underwent thoracotomy and definitive occlusion of the left  
21 anterior descending coronary artery was either left intact (sham) or occluded with a 5.0 nylon  
22 monofilament suture at 1 mm from its origin to cause myocardial infarction (MI).

23 **Clinical study of experimental models.** Cardiomyopathy development in rat and mouse was  
24 monitored under 1.5-2 % isoflurane anesthesia by transthoracic echocardiography as previously

1 described<sup>12</sup>, using a Vivid 7 dimension cardiovascular ultrasound system equipped with a probe  
2 of 9-14 MHz frequency (GE Healthcare, Vélizy, France). Bi-dimensional (B) and time-motion  
3 (TM) mode views were recorded along the parasternal long axis from mitral and aortic valves  
4 to apex and in a short axis at the level of the mid papillary muscles. Left atrial area (LAA) was  
5 measured using B-mode. TM-mode was used for measurements of left atrial diameter and left  
6 ventricle parameters such as diameter (Vd) and volume (Vd) at end diastole, diameter (Ds) and  
7 volume (Vs) at end systole. The percentage of left ventricular fractional shortening (FS) in the  
8 long-axis view was calculated as  $(Dd - Ds)/Dd \times 100$ . The left ventricle ejection fraction  
9 percentage (EF) was calculated as  $(Vd-Vs)/Vd \times 100$ . All measurements were performed and  
10 averaged over five consecutive cardiac cycles by one single blinded operator. Reproducibility  
11 was assessed by triplicate measurements.

12 Atrial fibrillation episodes were induced by atrial burst pacing. Under anesthesia, a 4-  
13 French stimulation catheter (Saint Jude medical) was inserted into the esophagus down to the  
14 level of the left atria. Left atrial was then stimulated for 3 seconds at 10 Hz and an  
15 electrocardiogram (ECG) was recorded. AF duration was calculated as the time between the  
16 end of stimulation and recovery of sinus rhythm.

17 **Human tissue.** Appendage samples of human atrial tissue were obtained for secretome studies  
18 (n=10), fixed and embedded in paraffin (n=109) for histology and immunofluorescence analysis  
19 or were used for the isolation of epicardial progenitor cells (n=15) as previously described  
20 (Supplementary Table 1)<sup>4</sup>.

21 **Histology.** Mouse and rat hearts were removed, perfused through the aorta with PBS, fixed in  
22 4 % paraformaldehyde (PFA) overnight. Mouse hearts were then dehydrated overnight in  
23 sucrose and embedded in OCT and frozen as described previously<sup>4</sup>. Human atrial appendage  
24 samples or rat hearts were fixed, dehydrated and paraffin embedded. Seven- $\mu$ m-thick sections

1 atria samples were stained with Masson's trichrome according to manufacturer's instructions  
2 (Sigma-aldrich). Bright field images were acquired with a Nikon DS-Ri1 camera coupled to  
3 Eclipse-Ti Nikon microscope and Nis-Element software (Nikon France S.A.) and analyzed with  
4 Image J software.

5 **Histomorphometry.** Seven- $\mu$ m-thick sections of human or murine atrial samples were stained  
6 with PicroSirius red according to manufacturer's instructions (Sigma-aldrich). Bright images  
7 were acquired with a Nikon DS-Ri1 camera coupled to Eclipse-Ti Nikon microscope and Nis-  
8 Element software (Nikon France S.A.) and analyzed with Histolab software (Evry, France).  
9 Collagen type I and III were visualized with polarization microscopy. The identification of  
10 fibers was based on the birefringence of collagen that was modulated by the binding of  
11 PicroSirius molecules. Polarization images were acquired with a Zeiss AxioObserver Z1 (Carl  
12 Zeiss, Germany) microscope, using a 20x NA 0.8 oil immersion objective and a Zeiss HRc  
13 camera. For image acquisition we used ZEN Blue software (Carl Zeiss, Germany).

14 **Differentiation of aEPDCs.** Human aEPDCs were culture in basal DMEM/M199 (1:1) and  
15 were differentiated into adipocytes with ANP (10 pM) for 21 days as described previously<sup>4</sup>. To  
16 induce human aEPDC-derived fibroblasts, progenitors were incubated in basal medium  
17 supplemented with Ang-II (10 nM) or TGF- $\beta$  (10 nM) (Sigma-Aldrich) for 7 or 21 days. A  
18 fibrogenic medium was used as a positive control, composed of DMEM/F12 (Invitrogen)  
19 supplemented with L-glutamin (2 mM), FCS (10 %) (Sigma-Aldrich), b-FGF (10 ng/ml), TGF-  
20  $\beta$  (10 nM) and penicillin-streptomycin (1%) (ThermoFisher Scientific)<sup>13-15</sup>. All media were  
21 changed twice per week.

22 **Immunofluorescence assay.** Adult EPDC-derived fibroblasts, human or murine atria tissue  
23 sections were incubated overnight with antibodies against collagen-1 (ab34710),  $\alpha$ SMA  
24 (ab7817), PDGFR $\alpha$  (ab5460), DDR2 (ab126773), FSP-1 (ab27957), WT1 (ab96792), Pref1

1 (ab119930), fibronectin (ab2413), Perilipin (ab3526), AGTR1 (ab124505), NPRA (ab70848)  
2 or Tcf21 (ab32981) purchased from Abcam and vimentin (#5741) or CD44 (#3570) purchased  
3 from Ozyme. Then antibodies were revealed using Alexa-Fluor 488 or Alexa-Fluor 594  
4 secondary antibodies (Thermo Fisher Scientific). Sections also were incubated with DAPI  
5 solution (Sigma-Aldrich). Images were acquired with a Nikon DS-Ri1 camera coupled to an  
6 Eclipse-Ti Nikon microscope and Nis-Element software (Nikon France S.A.) or Zeiss LSM800  
7 (Carl Zeiss, Germany) and analyzed with Image J software.

8 **Oil red O staining.** Adult EPDC-derived cells were fixed with PFA (4 %) and stained with oil-  
9 red-O as described previously<sup>4</sup>. All images were acquired with a Nikon DS-Ri1 camera coupled  
10 to an Eclipse-Ti Nikon microscope and Nis-Element software (Nikon France S.A.), and  
11 analyzed with Image J software.

12 **Flow Cytometry and cell sorting.** Characterization of human aEPDCs was assessed by using  
13  $1.10^6$  cells/mL. Cells were passaged using TrypLE (Applied Biosystems) and were washed with  
14 PBS containing 5 % (vol/vol) FCS as described previously.

15 Human aEPDCs were incubated with specific membrane antibodies against PDGFR $\alpha$   
16 (ab5460), DDR2 (ab126773), Pref1 (ab21682; Abcam), Perilipin (ab3526; Abcam), AGTR1  
17 (ab124505) or NPRA (ab70848) purchased from Abcam, and their specific isotype controls for  
18 30 min at room temperature. Cells then were incubated with Alexa-Fluor 650, washed, fixed  
19 with 0.1 % PFA, and analyzed by flow cytometry using a MACSQuant analyzer (Miltenyi  
20 Biotech, Paris, France), and FlowJo software (FlowJo LLC). Cells sorting was performed with  
21 coupled antibodies against PDGFR $\alpha$ -FITC or Pref1-APC. Cells were sorted by ASTRIOS  
22 (Beckman Coulter, Villepinte, France) and were cultured in aEPDC culture medium.

23 **Single cell RNA-sequencing.** Adult EPDCs from sham or HF rats were isolated from atrial  
24 epicardium explants and passaged once in culture. Epicardial cells and aEPDC in culture were



1 dissociated with trypsin into a single cell suspension in the presence of 100 nM thiazovivin,  
2 filtered through a 40  $\mu\text{m}$  mesh and 10 000 cells were processed with the SingleCell3 Reagent  
3 Kit on the Chromium platform as described by the manufacturer (10X genomics). cDNA  
4 libraries were sequenced with a Next-seq Illumina sequencer. A first analysis was performed  
5 with cell Ranger and C-loop 10X genomics softwares. Clusters and subclusters were defined  
6 using genes differentially expressed in cell clusters in comparison with all other cells with a  
7 threshold of Log2 equal to at least 2. Then a secondary analysis was done using the computational  
8 workflow ScshinyHub (<https://github.com/baj12/scShinyHub>), developed by B. Jagla at  
9 Pasteur Institute, Paris. A total number of 16 400 genes were detected and an average of  
10 3400 genes was expressed in all cells. Trajectory inference was performed using SCORPIUS  
11 package within ScshinyHub.

12 **RNA Extraction and Reverse Transcription and qPCR Assay.** Total RNA was isolated from  
13  $1.10^4$  aEPDCs-derived fibroblasts and qPCR was performed using a TaqMan Gene Expression  
14 Assay as described previously<sup>4</sup> (Supplementary Table 2). Expression relative to GAPDH was  
15 calculated using the  $2^{-(\Delta\Delta\text{Ct})}$  method. Gene expression levels were expressed in arbitrary units  
16 (AU) and were normalized to control.

17 **Western Blot Analysis.** Human aEPDCs were cultured in six-well plates and were treated with  
18 fibrogenic medium or Ang-II (10 nM) for 7 days. Cellular lysis was performed as described  
19 previously<sup>4</sup>. Proteins (10  $\mu\text{g}$ ) were separated on 10 % (vol/vol) SDS-polyacrylamide gels  
20 followed by electrophoretic transfer of protein to nitrocellulose membrane (Thermo Fisher  
21 Scientific). Membranes were incubated overnight with antibodies against Smad2/3 (#8685 and  
22 #3122) or p38-MAPK (#4511 and #9212) (Ozyme). Expression levels relative to GAPDH (#  
23 2118; Ozyme) were expressed in arbitrary units and were normalized to control. Membranes  
24 were revealed using streptavidin-HRP-conjugated secondary antibody solution (Thermo Fisher

1 Scientific). Membranes were exposed to an Image Quant LAS4000 camera (GE Healthcare)  
2 and were analyzed with Image J software.

3 **Statistics.** Data obtained are expressed as means  $\pm$  S.E.M. Differences were investigated using  
4 un-paired 2-tailed Student's *t*-test or a one-way analysis of variance (ANOVA) with  
5 Bonfferoni's post-hoc test, considered significant at  $P < 0.05$ . Statistical analysis was performed  
6 with Prism GraphPad 6.0 (Software Inc.).

7 Before any statistical analyses of histomorphometry, log-transformation was applied to  
8 reduce any skewness in the distribution of the epicardial adipose tissue and epicardial fibrosis  
9 variables. Pearson correlation coefficients were computed between biological and  
10 anthropometric variables while adjusting for age, gender and BMI when appropriate.  
11 Association of biological parameters with clinical outcomes was assessed using logistic  
12 regression adjusted for age and gender. The statistical threshold used for declaring statistical  
13 association was fixed to 0.05. Analyses were performed using the R statistical computing  
14 software.

15

## 1 **Results**

### 2 **Evidence for epicardium activation and remodeling in human atria**

3 In human right atrial tissue sections, the epicardium presented various histological aspects.  
4 These included a thin cell monolayer separated from adjacent myocardium (Fig. 1a, (i)) or  
5 adipose tissue (Fig. 1a, (ii)) by a regularly arranged basal extracellular matrix (ECM) mainly  
6 composed of collagen-1 (Fig. 1a, (iii)). Alternatively, it constituted a thick layer ( $47.43 \pm 17.7$   
7  $\text{mm}^2$ ) in continuity with dense fibrosis (Fig. 1a, (iii,iv)). Under polarized light, extracellular  
8 matrix of the thin epicardium was mainly composed of regularly arranged yellow-red strong  
9 birefringence collagen-1 (Fig. 1b, (ii)), whereas in thick and fibrotic epicardium, collagen-1 and  
10 -3 (yellow-green birefringence) fibers were disorganized (Fig. 1b, (iii,iv))<sup>16</sup>. A number of cells  
11 co-expressing mesenchymal cell markers  $\alpha\text{SMA}$  ( $8.4 \pm 0.9\%$ ) or  $\text{PDGFR}\alpha$  ( $10.3 \pm 2.1\%$ ) were  
12 present in the thick and fibrotic epicardium (Fig. 1c, Supplementary Table 3a).

13 The percentage of fatty infiltrates correlated negatively with the epicardium thickness  
14 ( $-0.52$ ,  $P < 0.01$ ,  $n = 109$ ) suggesting a mutual exclusion of the two histological components.  
15 Hence, the ratio of adipose tissue to epicardial fibrosis (EAT/epi Fibrosis) was used as a marker  
16 of epicardial area remodeling. Looking deeply into these data revealed that EAT/epi Fibrosis  
17 tended to differentially associate with clinical outcomes according to patient age. Indeed, in  
18 patients over 70 years-old (which corresponds to the median age in our population), we  
19 observed that the EAT/epi Fibrosis ratio significantly decreased in atrial sections from patients  
20 with valve mitral diseases ( $0.33$  vs  $0.84$ ,  $p < 0.05$ ) and that there was a tendency to decrease in  
21 patients with permanent AF ( $0.32$  vs  $0.86$ ,  $p = 0.211$ ) with no overlap between both groups  
22 (Supplementary Table 4). These histological observations suggest that low grade activation of  
23 the epicardium can contribute to the remodeling of the atrial myocardium.

24

### 25 **Recruitment of epicardial progenitors into the subepicardium of human atria**

1 We previously reported the presence of cells expressing the marker of epicardial progenitors  
2 Wilm's tumor (WT)-1 and of pre-adipocytes in the subepicardium of human atria<sup>4</sup>. Here, we  
3 found that WT-1 positive cells expressing markers of myofibroblasts ( $\alpha$ SMA) or fibroblasts  
4 (PDGFR $\alpha$ ) too were detected in the subepicardium of human atria (Fig. 1d) (Supplementary  
5 Table 3a).

6 These data raised the question as to the presence of subset of cells derived from  
7 epicardial progenitors and that could differentiate into distinct mesenchymal cell lines *i.e*  
8 adipocyte or fibroblasts. This idea was further supported by the observation that atrial aEPDCs  
9 showed distinct behavior in culture when treated with a myocardial secretome from human  
10 atria. After 21 days in culture, one-third of the cells presented fibroblast phenotypes including  
11 an elongated shape and expression of ECM proteins such as collagen-1 and fibronectin together  
12 with fibroblast markers such as vimentin,  $\alpha$ SMA, PDGFR $\alpha$  and DDR2. The remaining two-  
13 thirds showed an adipocyte phenotype, expressing perilipin and containing lipid droplets (Fig.  
14 2a-c).

15 Next, aEPDCs were sorted based on the expression of Pref1 or PDGFR $\alpha$  (Fig. 2d). After  
16 21 days of culture in the presence of a fibrogenic medium, only PDGFR $\alpha$ <sup>+</sup> cells presented  
17 fibroblast phenotypes with  $\alpha$ SMA labeling (Fig. 2e,f). In contrast, in the presence of an  
18 adipogenic medium, only Pref1<sup>+</sup> cells became round-shaped and contained oil red-O stained  
19 lipid droplets and expressed perilipin typical of adipocytes (Fig. 2e,f). In addition, fibrogenic  
20 gene expression was observed in PDGFR $\alpha$ <sup>+</sup> cells when cultured in fibrogenic medium, whereas  
21 Pref1<sup>+</sup> cells cultured under adipogenic medium induced expression of adipocyte transcripts  
22 (Fig. 2g). These results suggest that distinct populations of aEPDCs can differentiate into  
23 fibroblast or adipocytes in response to various hormonal stimulations.

24 **Distinct signaling pathways regulate differentiation of subsets of human aEPDCs.**

1 Next, we attempted to identify if distinct signaling pathways could regulate aEPDC fate.  
2 Following our previous finding of the presence of the adipogenic factor ANP in myocardial  
3 secretome (MYO-S)<sup>4</sup>, we hypothesized that fibrogenic factors were also present in the  
4 secretome. Several candidates were detected in MYO-S such as TGF- $\beta$  or Angiotensin (Ang)-  
5 II<sup>4</sup>. Interestingly, *in vitro*, aEPDCs acquired a fibroblast phenotype in the presence of Ang-II or  
6 TGF- $\beta$ , as indicated by the up-regulation of PDGFR $\alpha$  and DDR2 (Fig. 3a, Supplementary Fig.  
7 1a). In addition, at the transcript level, expression of the various ECM and fibroblast genes were  
8 up-regulated (*COL1A1*, *CTGF*, *TGFB*, *PDGFR $\alpha$*  and *FSP1*) whereas that of adipogenic  
9 (*CEBP $\alpha$* , *PPAR $\gamma$* , *PERILIPIN-1*) genes were down-regulated in Ang-II treated cells compared  
10 with ANP treated cells (Fig. 3b,c, Supplementary Fig. 1b). Moreover, Ang-II inhibited  
11 perilipin-1 protein expression compared to ANP (Fig. 3d) and a subset of aEPDCs remained  
12 Pref-1<sup>+</sup> (Fig. 3e). Finally, the fibrogenic canonic Smad2/3 and p38-MAPK signaling pathways  
13 were activated in this culture condition (Fig. 3f)<sup>17,18</sup>.

14 Interestingly, both transcript levels and the plasma membrane expression of  
15 Angiotensin-II receptor 1 (AGTR1) were induced by Ang-II in aEPDCs, whereas the ANP  
16 receptor, NPRA, was undetectable (Fig. 3d,e). The opposite result was obtained in cells treated  
17 with ANP *i.e* up-regulation of NPRA and down regulation of AGTR1 expression were observed  
18 (Fig. 3d,e). Flow cytometry showed that Ang-II increased the fraction of cells expressing  
19 PDGFR $\alpha$  and the pre-adipocyte marker, Pref1, whereas cell expressing perilipin, *i.e.* mature  
20 adipocytes, could not be detected (Fig. 3a, 3e). These results indicate that distinct signaling  
21 pathways regulate aEPDC differentiation.

22

### 23 **Adult EPDC are recruited at early stage of experimental atrial remodeling**

24 To examine whether the epicardium is activated during the atrial remodeling, we studied a well-  
25 characterized model of atrial remodeling secondary to ischemic HF in rats<sup>19</sup>. Two months

1 following the onset of the ischemic cardiopathy, all animals were in HF with dilated atria (Fig.  
2 4a,b, and Supplementary Fig. 2a-c). They showed a vulnerability to AF as indicated by a longer  
3 duration of triggered episodes of AF compared to shams (Supplementary Fig. 2d,e). After  
4 sacrifice, histological analysis revealed a hypertrophied and fibrotic myocardium in dilated atria  
5 of HF rats compared to sham (epicardial fibrosis area in atria  $70.3 \pm 8.3\%$  vs  $42.8.2 \pm 7.9\%$ ,  
6  $P < 0.001$ ) (Fig. 4a,b). In addition, collagen-1 and collagen-3 were also disorganized and  
7 irregularly arranged (Fig. 4c).

8         Interestingly, the epicardium was thick (epicardial fibrosis area in atria  $78.95 \pm 1.6\%$   
9 vs  $56.61 \pm 4\%$ ,  $p < 0.001$ ) and a packed fibrosis composed of collagen and fibronectin depots  
10 was observed in the subepicardium of dilated atria of HF rat (Fig. 4d). Both fibroblasts  
11 expressing PDGFR $\alpha$  and myofibroblasts expressing  $\alpha$ SMA were detected in the subepicardial  
12 fibrosis (Fig. 4d,e). In addition, adipocytes were observed (epicardial adipocyte area in atria  
13  $37.72 \pm 6.13\%$ ,  $P < 0.05$ ) (Fig. 4a). Expansion of the epicardium was observed already one  
14 week after MI ( $80.12 \pm 8.6\%$  vs  $55.25 \pm 7.1\%$ ,  $p < 0.01$ ), and reached a plateau with  
15 progression of the cardiomyopathy (Fig. 4a,b). Some cells were double-positive for  $\alpha$ SMA and  
16 WT1 or PDGFR $\alpha$  and Tcf21, a transcription factor involved in fibroblast cell fate acquisition<sup>20</sup>  
17 (Fig. 4e,f, Supplementary Table 3b). Interestingly, some WT1(+); Pref-1(+) cells were localized  
18 in epicardial monolayer (Fig. 4e,f, Supplementary Table 3b). These results indicate that  
19 epicardium expansion is an early event in the development of atrial cardiomyopathy and that  
20 fibroblasts derived from activated epicardium could contribute to the remodeling of the atrial  
21 subepicardium.

22

### 23 **Evidence for epicardial progenitor origin of fibroblasts in the atrial subepicardium**

24 In order to obtain direct evidence that epicardium could be a source of fibroblasts during atrial  
25 remodeling, we reproduced the model of atrial cardiomyopathy secondary to ischemic HF in

1 the WT1Cre<sup>ERT2+/-</sup>;ROSA26<sup>tdT+/-</sup> mice, allowing genetic lineage tracing of WT1-positive  
2 epicardial progenitor cells in adult heart<sup>2,4,21,22</sup>. As in rats, two months after surgical MI, mice  
3 had developed HF with dilated and remodeled atria (Supplementary Fig. 2f-h). Furthermore,  
4 the epicardium was thick and remodeled (epicardial fibrosis area in atria  $78.13 \pm 5.5$  vs  $53.46$   
5  $\pm 4.5$ ,  $p < 0.001$ ) with packed and dense fibrosis (Fig. 5a,b).

6 As expected tdT<sup>+</sup>-WT1<sup>+</sup> cells predominated in the epicardial layer in both sham and HF  
7 mice (Fig. 5c). In contrast, only in the latter group, tdT<sup>+</sup> cells were seen in the sup-epicardium  
8 of the atria indicating epicardial activation and aEPDC migration (Fig. 5c). Some of the WT1-  
9 positive cells of sup-epicardium expressed either  $\alpha$ SMA or PDGFR $\alpha$  (Fig. 5c). Atrial epicardial  
10 progenitors in WT1Cre<sup>ERT2+/-</sup>;Rosa26<sup>tdT+/-</sup> mice also expressed the fibroblast marker Tcf21 (Fig.  
11 5d). More limited numbers of adult epicardium derived PDGFR $\alpha$ <sup>+</sup> fibroblasts were found in the  
12 subepicardium of the atria (Fig. 5e). Of note, epicardial-derived myofibroblasts were observed  
13 associated only with atrial epicardium but not with ventricular epicardium outside of the  
14 infarcted area (Fig. 5e). Interestingly, we observed heterogeneous expression of PDGFR $\alpha$  and  
15 Pref1 in embryonic and adult atrial epicardium, suggesting that epicardial cell heterogeneity  
16 may underlie aEPDC composite (Supplementary Fig. 3a). In embryo at E11.5, both Pref-1(+)  
17 and PDGFR $\alpha$ (+) cells were located in epicardium monolayer (Supplementary Fig. 3a).  
18 Interestingly, after EMT process (E16.5)<sup>23</sup>, only Pref1(+) cells were observed in epicardium  
19 whereas PDGFR $\alpha$ (+) were in sub-epicardium similar to sham adult atria (Supplementary Fig.  
20 3a). In addition, in embryos, epicardium contained Pref1(+) cells was co-expressed with NPRA  
21 and PDGFR $\alpha$ (+) cells was co-expressed with AGTR1 (Supplementary Fig. 3b,c). These results  
22 indicate that resident atria epicardial progenitor cells reactivate to differentiate into fibroblasts  
23 or adipocyte during atrial remodeling.

24

## 1 **Single cell RNA-sequencing analysis and the evidence for subset of aEPDC recruited** 2 **during atrial remodeling**

3 Explants of rat atria from healthy (sham) or HF rat were cultured until epicardial cells migrated  
4 outside the explants. Cells were then sub-cultured for one passage and used for single cell RNA-  
5 sequencing.

6 We used a non-linear dimensionality reduction method (t-stochastic neighbor  
7 embedding t-SNE) to plot the data. In rat atria epicardium, ten clusters were defined in  
8 differentially expressed genes in aEPDCs (Fig. 6a, Supplementary Table 5). Two major  
9 populations expressing *WT1*<sup>+</sup> and *PDGFRβ*<sup>+</sup>, respectively, were clearly identifiable in both  
10 healthy and HF samples (Fig. 6b). Interestingly the *WT1*<sup>+</sup> population expressed *PDGFRα* and  
11 *ATGRI* (Fig. 6b). Some cells at the border of the fibroblast cluster facing the epicardial *WT1*<sup>+</sup>  
12 cluster highly expressed both *ATGRI* and *PDGFRα* (Fig. 6b). No significant difference in  
13 expression of *WT1*, *ATGRI*, *FSTLI* or *NPRA* is detected in epicardial cells from healthy or  
14 diseased rat hearts (Supplementary Fig. 4). 3D Tsne1 revealed a segregation of cells between  
15 sham and HF samples (Fig. 6c).

16 On the other hand, comparison by t-SNE of the aEPDC populations in both healthy and  
17 diseased atria revealed major differences. A heatmap of five modules of differentially expressed  
18 fibrosis-relevant genes (*SI00A4*, *COL1A1*, *COL3A1*) plotted from healthy and remodeled rat  
19 atria aEPDCs revealed major differences in the extent of fibrosis in each cell population  
20 (Supplementary Fig. 5). Violin plots of *COL1A1* and *-3A1*, two markers of fibroblast ECM  
21 confirmed fibrosis in HF aEPDCs (Fig. 6e, Supplementary Fig. 5).

22 Next, we further investigated the fibrosis process in HF aEPDCs. Clustering of HF  
23 EPDCs showed the heterogeneity of the cell population (Fig. 6a). We first applied a linear  
24 inference trajectory analysis to both sham and HF rat aEPDCs. This analysis revealed that cell  
25 transcriptomic profiles segregated the two aEPDCs populations (Supplementary Fig 6). In order



1 to track the fibro-fatty pathological process of diseased atria, we thus performed linear  
2 trajectory inference on the HF rat aEPDCs (Fig. 7a,b). This analysis revealed that few aEPDCs  
3 at the starting point of the trajectory (cluster 10, mesothelial cells) still expressed mesothelial  
4 markers such as *MSLN*. Then, aEPDCs transitioned from adipogenic (*BMP4*, *LUM*, *UCP2*) to  
5 fibrotic (*COL1A1*, *COL3A1*, *FNI*) cell types (Fig. 7b,c, Supplementary Fig. 7, Supplementary  
6 Fig. 8). Adipogenic markers *RACK1* has been reported as an inducer of PPAR- $\gamma$  and C/EBP-  
7  $\beta$ , and both *RACK1* and *BMP4* are involved in adipogenesis<sup>24,25</sup> as well as the elongation factor  
8 *EEF2* reported to be a mediator of adipogenesis<sup>26</sup> (module 1, Fig. 7c, Supplementary Fig 7, and  
9 Supplementary Table 5). Modules 2 and 3, included cells undergoing the pathological process  
10 of adipocyte to fibroblast transition that takes place under hypoxia in the likely presence of an  
11 inflammatory phenomenon<sup>27</sup> (Fig. 7c, Supplementary Fig 7, and Supplementary Table 5).  
12 Interestingly, *CTGF*, an inhibitor of adipogenesis<sup>28</sup>, was increased in module 2, an index of the  
13 transition from adipose to fibrotic tissue. Finally, module 4 pointed to a feedback loop leading  
14 to a *de novo* engagement of remaining epicardial mesothelial *MSLN6+* cells through a process  
15 of EMT (*MFAP5*) toward adipogenesis (*COL6*, *CLMP*) and inflammatory fibrosis (*CCL2*,  
16 *CCL7*, *IL33*) (Fig. 7c, Supplementary Fig 7, and Supplementary Table 5).

17

18

19

20

21

22

23

## 1 **Discussion**

2 The accumulation of adipose and fibrosis tissue in the subepicardium has been recognized as  
3 an important determinant of the formation of the substrate of AF and understanding how the  
4 disease substrate develops is a key clinical issue. Herein, we found that following epicardial  
5 EMT, adult EPDCs maintain an adipogenic potential in epicardial layer and that they can transit  
6 to a fibrotic phenotype in response to various stimuli.

7 The origin of myofibroblasts and fibroblasts involved in extracellular matrix remodeling  
8 of the myocardium is still debated<sup>22,29</sup>. In adult mouse ventricles, challenged by transaortic  
9 constriction or ischemia, most fibroblasts expand from developmentally-derived resident  
10 fibroblasts<sup>22,29-31</sup>. Furthermore, following acute myocardial ischemia, epicardium is also  
11 activated and directly contributes to fibroblasts in the subepicardial area<sup>2</sup>. We provide evidence  
12 that in the atria too, epicardial expansion results in *de novo* fibroblast generation. First, cells co-  
13 expressing markers of epicardial progenitors and fibroblasts can be detected in the  
14 subepicardium of human and rat diseased atria, in agreement with a recent study<sup>17</sup>. Second, a  
15 number of fibroblasts proximal to the remodeled adult atrial epicardium of WT1<sup>CreERT2+/-</sup>  
16 ;ROSA26<sup>tdT+/-</sup> mice was labelled, pointing to their epicardial origin. Along these lines, it has  
17 been reported that resident epicardial precursors from the right atrial appendages can  
18 differentiate into fibroblasts, especially when obtained from AF patients<sup>18</sup>.

19 Distinct signaling pathways could operate as a switch to regulate the recruitment and  
20 fate of these epicardial progenitor cells. Indeed, several growth factor signaling pathways have  
21 been implicated in the induction of EMT, the recruitment of epicardial cells and their  
22 differentiation into mesenchymal cell lines. For instance, PDGF acts on the transcription factor  
23 Sox9 as a downstream target of PDGF stimulated EMT<sup>23</sup>. We reported previously that ANP is  
24 a potent adipogenic factor for aEPDCs<sup>4</sup>. Here, we show that during embryonic development the  
25 epicardium contains adipocyte and fibroblast precursors. Following EMT, adipocyte precursors

1 expressing NPRA are localized in epicardium layer and AGTR1<sup>+</sup> fibroblast precursors are  
2 found in sub-epicardium layer. In adult, we found that Ang-II induced differentiation of  
3 aEPDCs into fibroblasts by up-regulating its receptor, AGTR1, and by activating the canonical  
4 Smad2/3 pathway<sup>32,33</sup>. Similarly, ANP up-regulated NPRA, and activated signaling resulting in  
5 adipocyte differentiation of aEPDCs<sup>4</sup>. Our data further suggested a positive feedback of the  
6 agonists on their signaling pathway by regulating expression of their own receptors to secure a  
7 long-lasting response of cells to the agonists. Opposite effects of Ang-II and ANP on  
8 fibrogenesis and adipogenesis, respectively, have been already reported. For instance, Ang-II  
9 inhibited differentiation of human pre-adipocyte cells<sup>34</sup>. An anti-fibrogenic effect of ANP has  
10 been described and attributed to the inhibition by the peptide of myofibroblast differentiation  
11 and fibroblasts activation<sup>35</sup>. Finally, Ang-II down regulates NPR1 expression at the  
12 transcription level<sup>36</sup>. These data suggest that from the embryo the epicardium progenitors could  
13 be pre-defined into different fates and their re-activation is depend of local stimuli.

14 Using scRNA-seq, we were able to provide novel insight into aEPDC heterogeneity and  
15 the relationships between aEPDC populations. Single cell RNA-seq analysis revealed six  
16 clusters of atrial epicardial cells and aEPDCs, including two predominant epicardial *WT1*<sup>+</sup> and  
17 *PDGFRβ*<sup>+</sup> clusters, and identified adipogenic and fibrogenic potential of these cells. Another  
18 major result provided by the scRNA-seq analysis of aEPDCs from diseased atria, is the process  
19 of a transition of epicardial cells from adipose and then fibrotic tissue. Our scRNA-seq data  
20 confirmed that a *de novo* EMT of remaining more resistant epicardial cells in the culture could  
21 be triggered by hypoxia and inflammatory processes (module 4, Fig 7c), giving rise to adipose  
22 tissue and further fibrosis as reported during obesity<sup>37</sup>. Indeed, linear trajectory inference  
23 suggested a progression of the disease from transient accumulation of fat tissue towards fibrosis.  
24 However, our data do not exclude that EPC undergoing EMT directly differentiate into  
25 fibroblasts.

1           This self-help mechanism originating from the epicardium and resulting in the  
2 generation of fibroblasts could explain why thin epicardial layer co-exists with thick and  
3 fibrotic epicardial area. This histological observation suggests that local mechanisms regulate  
4 the activation the epicardium resulting in focal accumulation of adipocytes and fibroblasts. An  
5 additional argument for local activation of the epicardium is that aEPDC-derived fibroblasts  
6 are observed only in the atria but not in the ventricle of WT1<sup>CreERT2+/-</sup>;Rosa26<sup>tdT+/-</sup> mice.  
7 Moreover, the thick and fibrotic remodeled epicardium predominates in atria from aged patients  
8 during clinical setting associated with atrial dilatation suggest that activation of the epicardium  
9 is a low grade process that contributes with time to the progression of atrial remodeling and the  
10 formation of AF substrate. Taken together, these histological and biological findings point to  
11 the presence of a subpopulation of aEPDCs that are pre-engaged in adipogenic or fibrogenic  
12 lineages, in the subepicardium and ready to be recruited in response to various stimuli, resulting,  
13 with time, in different degrees of fibro fatty infiltrates.

14

15

16

17

18

19

20

21

22

23

24

25

## 1 **Conclusion**

2 We found that subsets of cells derived from epicardial progenitors and confined into the  
3 subepicardium regulate, the balance between AT expansion and fibrosis accumulation in the  
4 atrial myocardium. Multiple factors coupled to signaling pathways can contribute to the  
5 recruitment of these “post EMT EPC” from their subepicardial “niche”. Our study provides a  
6 biological basis for the slow and low noise remodeling of the atrial subepicardium which  
7 progresses with time or during chronic cardiac diseases. It remains to determine when this  
8 apparent aging phenomenon becomes pathological and can contribute to the substrate of AF.

9

## 10 **Acknowledgement**

11 We are grateful to Orestis Faklaris from Jacques Monod Institute for technical support with  
12 polarized light and Florence Deknuydt from cardiometabolism and nutrition for technical  
13 support with fluorescence-activated cell sorting and flow cytometer.

14

## 15 **Source of funding**

16 We thank the Leducq Foundation for its continuous support of our research. This work was  
17 supported by the French National Agency through the national program Investissements  
18 d’Avenir Grant ANR-10-IAHU-05 (to N.S., G.D., M.B., D.A.T., P.L. and S.N.H.) and through  
19 the Recherche Hospital-Universitaire-Cardiac & Skeletal Muscle Alteration in Relation to  
20 Metabolic Diseases and Ageing: Role of Adipose Tissue (RHU-CARMMA) Grant ANR-15-  
21 RHUS-0003 and the Fondation de La Recherche Medicale (to N.S. and S.N.H.). This project  
22 received funding from the European Union’s Horizon 2020 Research and Innovation  
23 Programme under Grant 633193 “CATCH ME” (N.S. and S.N.H.). N.S. was supported by  
24 European Union Program Horizon 2020 (CATCH ME). We thank The Leducq Fondation for

1 generously awarding us for the equipment of the cell imaging facility (to MP at INSERM  
2 U1251) in the frame of their program “Equipement de Recherche et Plateformes  
3 Technologiques” (ERPT).

4

#### 5 **Disclosures**

6 None

7

#### 8 **Affiliations**

9 From Sorbonne universités, Faculté de médecine UPMC, Paris, France (N.S., N.M., D.A.T.,  
10 G.D., M.B., P.L., S.N.H.); Aix Marseille Univ, INSERM, MGG, U 1251, Marseille, France  
11 (T.M.M., M.P.) ; Department of Cardiology, Assistance Publique - Hôpitaux de Paris, Pitié-  
12 Salpêtrière Hospital, Paris, France (P.L., S.N.H.) ; Medical Biochemistry Institute and  
13 molecular biology, University Medical Center, Greifswald Germany (C.W., U.L.); Institute of  
14 Cardiometabolism and Nutrition, ICAN, Paris, France (N.S., N.M., D.A.T., G.D., M.B., P.L.,  
15 S.N.H.).

16

#### 17 **Contributions:**

18 N.S. contributed to the design of the experiments, conducted the experiments, analyzed data  
19 and was involved in writing of the manuscript. T.M-M. contributed to WT1Cre<sup>ERT2+/-</sup>  
20 ;ROSA26<sup>tdT+/-</sup> transgenic mice, to the design of the experiments, conducted the experiments,  
21 analyzed data and was involved in writing of the manuscript. N.M. contributed to realize and  
22 characterize experimental models and analyze data. G.D. and M.B. contributed to perform  
23 histological research. B.J. contributed to analyze scRNA-seq. J.P. contributed to perform

1 research. P.L.P. contributed to perform research and provide human samples. D.A.T  
2 contributed to analyze data. M.P. contributed to the design of the experiments, conducted the  
3 experiments, analyzed data and was involved in writing of the manuscript. S.N.H contributed  
4 to the design of the experiments and supervised and wrote of the manuscript.

5

## 1 **References**

- 2 1. Amenta, F. *et al.* GABAA receptor sites modulating catecholamine secretion in the rat  
3 adrenal gland: evidence from 3H-muscimol autoradiography and in vivo functional  
4 studies. *Pharmacology* **37**, 394–402 (1988).
- 5 2. Zhou, B. *et al.* Adult mouse epicardium modulates myocardial injury by secreting  
6 paracrine factors. *J. Clin. Invest.* **121**, 1894–1904 (2011).
- 7 3. Yamaguchi, Y. *et al.* Adipogenesis and epicardial adipose tissue: a novel fate of the  
8 epicardium induced by mesenchymal transformation and PPAR $\gamma$  activation. *Proc. Natl.*  
9 *Acad. Sci. U. S. A.* **112**, 2070–2075 (2015).
- 10 4. Suffee, N. *et al.* Atrial natriuretic peptide regulates adipose tissue accumulation in adult  
11 atria. *Proc. Natl. Acad. Sci. U. S. A.* (2017). doi:10.1073/pnas.1610968114
- 12 5. Antonopoulos, A. S. *et al.* Mutual Regulation of Epicardial Adipose Tissue and  
13 Myocardial Redox State by PPAR- $\gamma$ /Adiponectin Signalling. *Circ. Res.* **118**, 842–855  
14 (2016).
- 15 6. Iacobellis, G. & Barbaro, G. Epicardial adipose tissue feeding and overfeeding the heart.  
16 *Nutr. Burbank Los Angel. Cty. Calif* **59**, 1–6 (2019).
- 17 7. Wong, C. X. *et al.* Pericardial fat is associated with atrial fibrillation severity and ablation  
18 outcome. *J. Am. Coll. Cardiol.* **57**, 1745–1751 (2011).
- 19 8. Allessie, M., Ausma, J. & Schotten, U. Electrical, contractile and structural remodeling  
20 during atrial fibrillation. *Cardiovasc. Res.* **54**, 230–246 (2002).
- 21 9. Chevalier, B. *et al.* Signal and adaptational changes in gene expression during cardiac  
22 overload. *J. Mol. Cell. Cardiol.* **21 Suppl 5**, 71–77 (1989).
- 23 10. Venteclef, N. *et al.* Human epicardial adipose tissue induces fibrosis of the atrial  
24 myocardium through the secretion of adipo-fibrokinases. *Eur. Heart J.* **36**, 795-805a (2015).



- 1 11. Haemers, P. *et al.* Atrial fibrillation is associated with the fibrotic remodelling of adipose  
2 tissue in the subepicardium of human and sheep atria. *Eur. Heart J.* (2015).  
3 doi:10.1093/eurheartj/ehv625
- 4 12. Jumeau, C. *et al.* Direct Thrombin Inhibitors Prevent Left Atrial Remodeling Associated  
5 With Heart Failure in Rats. *JACC Basic Transl. Sci.* **1**, 328–339 (2016).
- 6 13. Ghavami, S. *et al.* Autophagy is a regulator of TGF- $\beta$ 1-induced fibrogenesis in primary  
7 human atrial myofibroblasts. *Cell Death Dis.* **6**, e1696 (2015).
- 8 14. Chong, J. J. H. *et al.* Progenitor cells identified by PDGFR-alpha expression in the  
9 developing and diseased human heart. *Stem Cells Dev.* **22**, 1932–1943 (2013).
- 10 15. Arrighi, N. *et al.* Characterization of adipocytes derived from fibro/adipogenic  
11 progenitors resident in human skeletal muscle. *Cell Death Dis.* **6**, e1733 (2015).
- 12 16. Street, J. M. *et al.* Automated quantification of renal fibrosis with Sirius Red and  
13 polarization contrast microscopy. *Physiol. Rep.* **2**, (2014).
- 14 17. Molkenin, J. D. *et al.* Fibroblast-Specific Genetic Manipulation of p38 Mitogen-  
15 Activated Protein Kinase In Vivo Reveals Its Central Regulatory Role in Fibrosis.  
16 *Circulation* **136**, 549–561 (2017).
- 17 18. Gambini, E. *et al.* Preferential myofibroblast differentiation of cardiac mesenchymal  
18 progenitor cells in the presence of atrial fibrillation. *Transl. Res. J. Lab. Clin. Med.* **192**,  
19 54–67 (2018).
- 20 19. Rucker-Martin, C. *et al.* Chronic hemodynamic overload of the atria is an important factor  
21 for gap junction remodeling in human and rat hearts. *Cardiovasc. Res.* **72**, 69–79 (2006).
- 22 20. Braitsch, C. M., Combs, M. D., Quaggin, S. E. & Yutzey, K. E. Pod1/Tcf21 is regulated  
23 by retinoic acid signaling and inhibits differentiation of epicardium-derived cells into  
24 smooth muscle in the developing heart. *Dev. Biol.* **368**, 345–357 (2012).

- 1 21. Zhou, B. *et al.* Epicardial progenitors contribute to the cardiomyocyte lineage in the  
2 developing heart. *Nature* **454**, 109–113 (2008).
- 3 22. Moore-Morris, T. *et al.* Resident fibroblast lineages mediate pressure overload-induced  
4 cardiac fibrosis. *J. Clin. Invest.* **124**, 2921–2934 (2014).
- 5 23. Smith, C. L., Baek, S. T., Sung, C. Y. & Tallquist, M. D. Epicardial-derived cell  
6 epithelial-to-mesenchymal transition and fate specification require PDGF receptor  
7 signaling. *Circ. Res.* **108**, e15-26 (2011).
- 8 24. Kong, Q. *et al.* RACK1 is required for adipogenesis. *Am. J. Physiol. Cell Physiol.* **311**,  
9 C831–C836 (2016).
- 10 25. Gustafson, B. *et al.* BMP4 and BMP Antagonists Regulate Human White and Beige  
11 Adipogenesis. *Diabetes* **64**, 1670–1681 (2015).
- 12 26. Eckertova, M., Ondrejckova, M., Krskova, K., Zorad, S. & Jezova, D. Subchronic  
13 treatment of rats with oxytocin results in improved adipocyte differentiation and increased  
14 gene expression of factors involved in adipogenesis. *Br. J. Pharmacol.* **162**, 452–463  
15 (2011).
- 16 27. Hepler, C. *et al.* Identification of functionally distinct fibro-inflammatory and adipogenic  
17 stromal subpopulations in visceral adipose tissue of adult mice. *eLife* **7**, (2018).
- 18 28. Tan, J. T. M. *et al.* Connective tissue growth factor inhibits adipocyte differentiation. *Am.*  
19 *J. Physiol. Cell Physiol.* **295**, C740-751 (2008).
- 20 29. Kanisicak, O. *et al.* Genetic lineage tracing defines myofibroblast origin and function in  
21 the injured heart. *Nat. Commun.* **7**, 12260 (2016).
- 22 30. Ali, S. R. *et al.* Developmental heterogeneity of cardiac fibroblasts does not predict  
23 pathological proliferation and activation. *Circ. Res.* **115**, 625–635 (2014).
- 24 31. Moore-Morris, T. *et al.* Infarct Fibroblasts Do Not Derive From Bone Marrow Lineages.  
25 *Circ. Res.* **122**, 583–590 (2018).

- 1 32. Hao, J., Wang, B., Jones, S. C., Jassal, D. S. & Dixon, I. M. Interaction between  
2 angiotensin II and Smad proteins in fibroblasts in failing heart and in vitro. *Am. J.*  
3 *Physiol. Heart Circ. Physiol.* **279**, H3020-3030 (2000).
- 4 33. Gao, X. *et al.* Angiotensin II increases collagen I expression via transforming growth  
5 factor-beta1 and extracellular signal-regulated kinase in cardiac fibroblasts. *Eur. J.*  
6 *Pharmacol.* **606**, 115–120 (2009).
- 7 34. Palominos, M. M., Dünner, N. H., Wabitsch, M. & Rojas, C. V. Angiotensin II directly  
8 impairs adipogenic differentiation of human preadipose cells. *Mol. Cell. Biochem.* **408**,  
9 115–122 (2015).
- 10 35. Li, P. *et al.* Atrial natriuretic peptide inhibits transforming growth factor beta-induced  
11 Smad signaling and myofibroblast transformation in mouse cardiac fibroblasts. *Circ. Res.*  
12 **102**, 185–192 (2008).
- 13 36. Garg, R. & Pandey, K. N. Angiotensin II-mediated negative regulation of Npr1 promoter  
14 activity and gene transcription. *Hypertens. Dallas Tex 1979* **41**, 730–736 (2003).
- 15 37. Trayhurn, P. Hypoxia and adipose tissue function and dysfunction in obesity. *Physiol.*  
16 *Rev.* **93**, 1–21 (2013).
- 17
- 18

1 **Legend**

2 **Fig. 1 Epicardium progenitor profile in human atrial epicardium expansion. (a,b)** Seven-  
3  $\mu\text{m}$ -thick sections of human atrial tissue (n=109) stained with Masson's trichrome and observed  
4 by transmitted light or (a) or PicroSirius red observed with polarized light microscopy (b)  
5 (collagen-1, Col1, red-yellow; collagen-3, Col3, green). Scale bar, 50  $\mu\text{m}$ , 25  $\mu\text{m}$ , inset 10  $\mu\text{m}$ .  
6 (b-d) Immunofluorescence staining of human atrial tissue sections (n=6) for Perilipin-1 (a),  
7 Col1 (a,c),  $\alpha\text{SMA}$  (c,d), PDGFR $\alpha$  (c,d) and WT1 (d). Scale bar, 100  $\mu\text{m}$ , 25  $\mu\text{m}$ , 10  $\mu\text{m}$ . M,  
8 myocytes; A, adipocytes.

9 **Fig. 2 Fibrogenic or adipogenic fates of aEPDCs. (a)** Representative images of aEPDCs  
10 incubated with MYO-S stained in oil-red-O and counterstained with hematoxylin (n=10). Scale  
11 bar, 100  $\mu\text{m}$ . Black arrows indicate elongated shape cells. (b) Flow cytometry analysis of  
12 aEPDCs treated with MYO-S (n=10). (c) Immunofluorescence staining in aEPDCs treated with  
13 MYO-S for Perilipin,  $\alpha\text{SMA}$ , Vimentin, Fibronectin, CD44 and Collagen-1. Scale bars, 100  
14  $\mu\text{m}$ , 50  $\mu\text{m}$ . (d) Analysis of PDGFR $\alpha$  and Pref1 expression in aEPDCs by flow cytometry  
15 (n=10). (e) Representative images and histogram of sorted PDGFR $\alpha^+$  or Pref1 $^+$  aEPDCa  
16 incubated with adipogenic medium or fibrogenic medium and stained with oil-red-O and  
17 counterstained with hemalun (n=10). Scale bars, 100  $\mu\text{m}$ , 50  $\mu\text{m}$ . (f) Perilipin or  $\alpha\text{SMA}$   
18 immunofluorescence staining of PDGFR $\alpha^+$  or Pref1 $^+$  sorted aEPDCs cultured with adipogenic  
19 medium or fibrogenic medium. Scale bar, 50 $\mu\text{m}$ . (g) Transcript expression levels of adipogenic  
20 and fibrogenic markers in PDGFR $\alpha^+$  or Pref1 $^+$  aEPDCs treated with fibrogenesis (left) or  
21 adipogenesis (right) medium.

22 **Fig. 3 Angiotensin-II induces fibrogenic differentiation of aEPDCs.**

23 (a) Flow cytometry and histogram analysis of aEPDCs treated with Ang-II (10 nM) for 7 days.  
24 (b,c) Transcript expression levels of fibrogenic (b), adipogenic, ANP or Angiotensin-II

1 receptors markers (c) in aEPDC treated with Ang-II (10 nM) (b,c) or ANP (10 pM) for 21 days  
2 (c). (d,e) Flow cytometry analysis and quantification of aEPDCs treated with Ang-II (10 nM)  
3 or ANP (10 pM). (f) Immunoblots and relative quantification of Smad2/3 or p38-MAPK  
4 signaling pathways in aEPDCs treated with Ang-II (10 nM) for 21 days. Data are expressed as  
5 mean  $\pm$  SEM of n=4 independent experiments. \*, P < 0.05, \*\*, P < 0.01, \*\*\* P < 0.001, one-way  
6 ANOVA with Bonferroni's post hoc test.

7 **Fig. 4 Epicardium remodeling is an early event during atrial remodeling in rat model of**  
8 **heart failure.** (a) Masson's trichrome staining of 7- $\mu$ m-thick sections of rat atrial tissue at 1  
9 week, 2 weeks or 2 months post-MI and Sham (n=5, each group) observed by transmitted light  
10 microscopy. Scale bar, 50  $\mu$ m, 25  $\mu$ m. (b) Histomorphometry assay quantification in rat atrial  
11 tissue post-MI (n=5, each group) and Sham (n=5, each group). (c) PicroSirius red of 7- $\mu$ m-thick  
12 sections of rat atrial tissue at 1 week or 2 months post-MI and Sham (n=3, each group) is  
13 observed under polarized light microscopy, collagen-1 (Col1, red-yellow), collagen-3 (Col3,  
14 green). Scale bar, 60  $\mu$ m. (d,e) Immunofluorescence staining in rat atrial tissue sections at 2  
15 months post-MI (d), 1 week post-MI (e) or Sham for Col1,  $\alpha$ SMA, PDGFR $\alpha$  (d,e), fibronectin  
16 (FNT) (d), WT1, Pref1 and Tcf21 (e). Scale bars, 200  $\mu$ m, 100  $\mu$ m, 50 $\mu$ m. (f) Scatter plots  
17 represent number of cell per field in sub- or epicardium of rat atria tissue. Data are expressed  
18 as mean  $\pm$  SEM of at least n=4 independent experiments. \*, P < 0.05, \*\*, P < 0.01, \*\*\* P  
19 <0.001, one-way ANOVA and Bonferroni's post hoc test. Epi., epicardium; A, adipocytes; M,  
20 Myocytes.

21 **Fig. 5 Epicardium is a source of fibroblasts during atrial remodeling in mouse model of**  
22 **heart failure.** (a) Masson's trichrome staining of 7- $\mu$ m-thick sections of WT1CreERT2<sup>+/-</sup>  
23 /Rosa-tdT<sup>+/-</sup> mouse atrial tissue at 2 months post-MI or Sham (n=5, each group). Scale bar, 200  
24  $\mu$ m, 100  $\mu$ m. (b) Histomorphometry assay quantification in WT1CreERT2<sup>+/-</sup>/Rosa-tdT<sup>+/-</sup> mice  
25 atrial tissue at 15 days, 1 months or 2 months post-MI (n=5) or Sham (n=5). (c-e)

1 Immunofluorescence staining of WT1CreERT2<sup>+/-</sup>/Rosa-tdT<sup>+/-</sup> mice atrial tissue sections at 2  
2 months post-MI or Sham for  $\alpha$ SMA or PDGFR $\alpha$  (c,e), Tcf21 (d). PDGFR $\alpha$ <sup>+</sup> fibroblasts derived  
3 from adult epicardium are indicated by arrows (e). Scale bars, 200  $\mu$ m, 100  $\mu$ m, 50  $\mu$ m. Data  
4 are expressed as the mean  $\pm$  SEM of n=4 independent experiments. \*, P < 0.05, \*\*\* P < 0.001,  
5 one-way ANOVA and Bonferroni's post hoc test. Epi., epicardium; Sup-Epi., sup-epicardium;  
6 LV, left ventricle; LA, left atria.

7 **Fig. 6 Differential transcriptional signatures aEPDCs at a single cell level between sham**  
8 **and diseased atria. (a)** 3D Tsne Plots of sham and heart failure (HF) rat aEPDCs. **(b)** Tsne  
9 plots of sham or diseased (HF) epicardial (EPC) and epicardial-derived (aEPDCs) cells for the  
10 four genes (*WT1*, *PDGFR $\beta$* , *PDGFR $\alpha$* , and *AGTR1 $\alpha$* ). **(c)** 3D tsne plot of sham and HF rat  
11 aEPDCs. **(d)** Heatmap of the sham and HF aEPDCs expressing *TCF21*, *POSTN*, *COL1A1* and  
12 *COL3A1*. **(e)** Violin plots of *COL1A1* and *COL3A1* expressing cells in sham and HF aEPDCs.  
13

14 **Fig. 7: Single cell analysis of aEPDCs trajectory during atrial remodeling in rat model of**  
15 **heart failure (HF). (a)** Tsne plots of clusters processed by Cell Ranger (10x Genomics). **(b)**  
16 Tsne inference trajectory of cells within the diseased aEPDC clusters (Scorpius algorithm). The  
17 pseudo-temporal ordering computational method allowed to track the fatty-fibrosis transition  
18 of cells together with an inflammatory process. **(c)** Heatmap of Inference trajectory of cells  
19 within the HF aEPDC (Scorpius algorithm). Genes are indicated on the right and colored  
20 according to the biological process indicated on the left boxes. Lines without genes (module 1)  
21 are genes without names just annotated in Ensembl (<http://www.ensembl.org/index.html>).  
22

23 **Supplementary Fig. 1 TGF- $\beta$  induces fibrogenic differentiation of aEPDCs. (a)**  
24 Representative images of aEPDCs treated with TGF- $\beta$  (10 nM) for 7 days and stained with oil-  
25 red-O and counterstained with hemalun or immuno-labeled for perilipin or  $\alpha$ SMA (n=5). Scale

1 bar, 100  $\mu\text{m}$ . **(b)** Expression of fibrosis genes in aEPDCs treated with TGF- $\beta$  (10 nM) for 7  
2 days compared to untreated (UT) control. Data are expressed as mean  $\pm$  SEM of n=4  
3 independent experiments. \*, P < 0.05, \*\*, P < 0.01, one-way ANOVA with Bonferroni's post  
4 hoc test.

5 **Supplementary Fig. 2 Vulnerability of AF in rat or mouse model of atrial remodeling**  
6 **associated with HF.** In rat 2-months post-MI (n=34) or sham (n=12) **(a-e)** or in mouse 2-  
7 months post-MI (n=6) or sham (n=10) **(f-h)**, histograms represent left atria area (LAA) **(a)**,  
8 ejection fraction (EF) **(b,g)**, fractional shortening (FS) **(c,h)** or arrhythmia duration **(d,f)**. **(e)**  
9 Paroxysmal atrial fibrillation episodes in rats 2-months post-HF. Each data are expressed as the  
10 mean  $\pm$  SEM of independent experiments. \*\*, P < 0.01, \*\*\* P < 0.001, unpaired Student's t test.

11 **Supplementary Fig. 3 Heterogeneity of atria epicardium in mouse model of atrial**  
12 **remodeling associated with HF.** Representative images of heterogeneity of Pref1 and  
13 PDGFR $\alpha$  **(a)**, NPRA **(b)** or ATR1 **(c)** expression in E11.5, E16.5, adult sham or HF atrial  
14 epicardium **(a)**, Scale Bar, 10 $\mu\text{m}$ , 50  $\mu\text{m}$ .

15 **Supplementary Fig. 4: gene profile of rat epicardial cells from healthy and diseased (HF)**  
16 **rat atria.** Left panel: Heat map of epicardium specific genes in both sham and HF dataset.  
17 Right panel: co-expression violin plot of 5 genes in both sham and HF dataset.

18 **Supplementary Fig. 5: Heat map of fibrotic genes in healthy (Sham) and diseased (HF)**  
19 **rat atria aEPDCs.**

20 **Supplementary Fig. 6: Trajectory from healthy (Sham) to diseased (HF) rat atria**  
21 **aEPDCs.**

22 **Supplementary Fig. 7: Trajectory influence heat map of healthy (Sham) and diseased**  
23 **(HF) rat atria aEPDC.** Data are analyzed with Scorpius logarithm.

- 1 **Supplementary Fig. 8 Heat map of adipogenic and fibrotic genes expression in both**  
2 **healthy and diseased (HF) rat atria aEPDCs.** Data are analysed wit Scorpius logarithm.
- 3 **Supplementary Table 1. Clinical parameters of patients.** BMI, body mass index; LVEF, left  
4 ventricular ejection fraction; AF, Atrial fibrillation; VMR, Mitral valve replacement.
- 5 **Supplement Table 2.** Taqman Human gene probes.
- 6 **Supplementary Table 3. (a)** Cell number per field in human atrial tissue. **(b)** Cell number  
7 per field in rat atrial tissue.
- 8 **Supplementary Table 4. Association of biological parameters with clinical outcomes.**  
9 LVEF, left ventricular ejection fraction; AF, Atrial fibrillation; VMR, Mitral valve  
10 replacment; (ye), years.
- 11 **Supplementary Table 5.** Dataset from scRNAseq analysis.
- 12  
13  
14  
15  
16  
17  
18



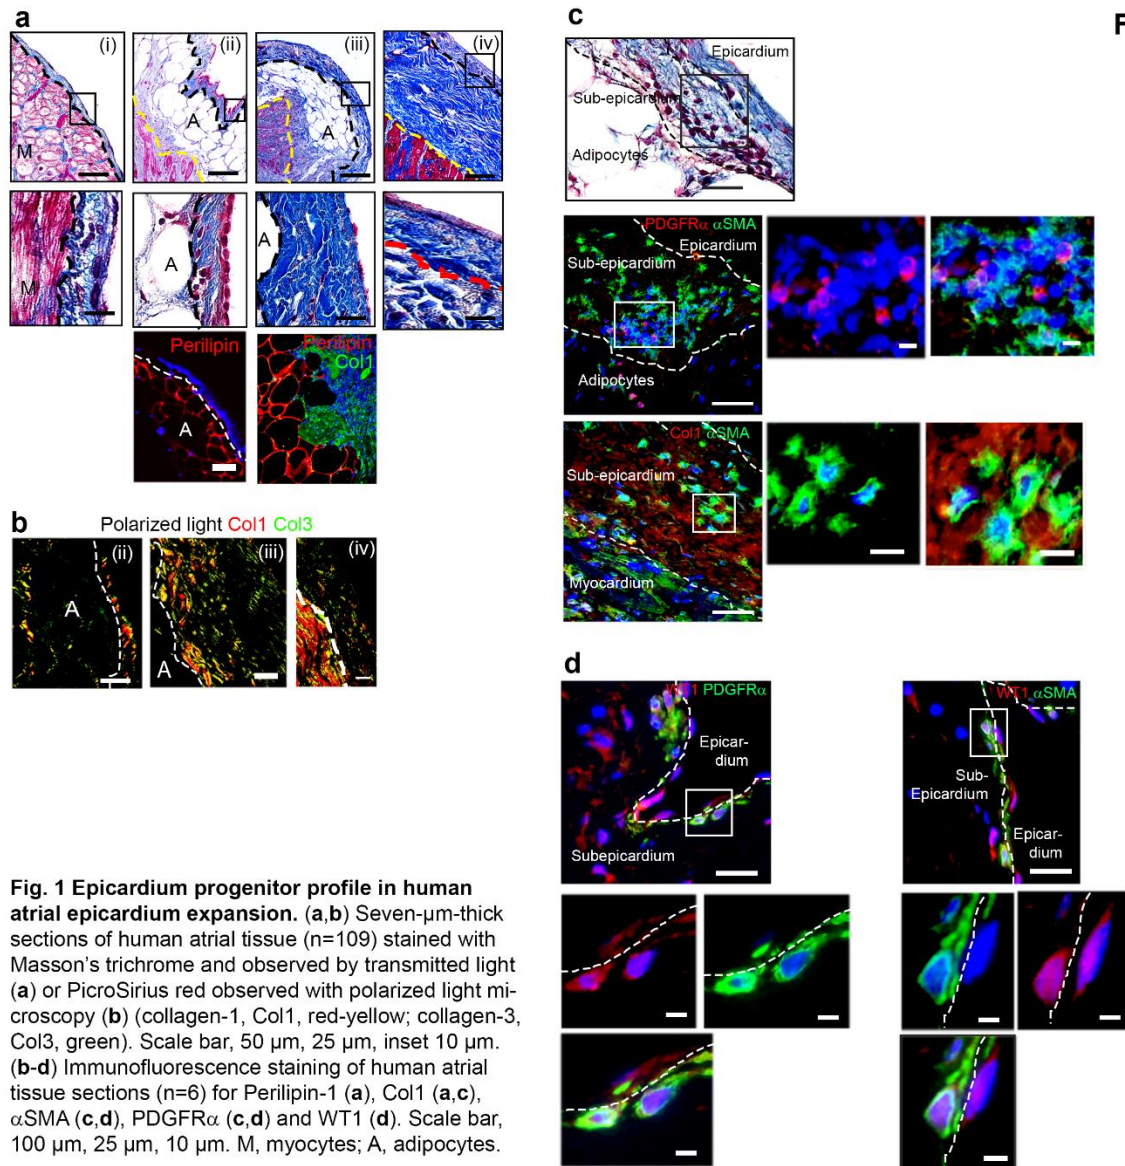

**Fig. 1**

**Fig. 1 Epicardium progenitor profile in human atrial epicardium expansion.** (a,b) Seven- $\mu$ m-thick sections of human atrial tissue (n=109) stained with Masson's trichrome and observed by transmitted light (a) or PicroSirius red observed with polarized light microscopy (b) (collagen-1, Col1, red-yellow; collagen-3, Col3, green). Scale bar, 50  $\mu$ m, 25  $\mu$ m, inset 10  $\mu$ m. (b-d) Immunofluorescence staining of human atrial tissue sections (n=6) for Perilipin-1 (a), Col1 (a,c),  $\alpha$ SMA (c,d), PDGFR $\alpha$  (c,d) and WT1 (d). Scale bar, 100  $\mu$ m, 25  $\mu$ m, 10  $\mu$ m. M, myocytes; A, adipocytes.

1

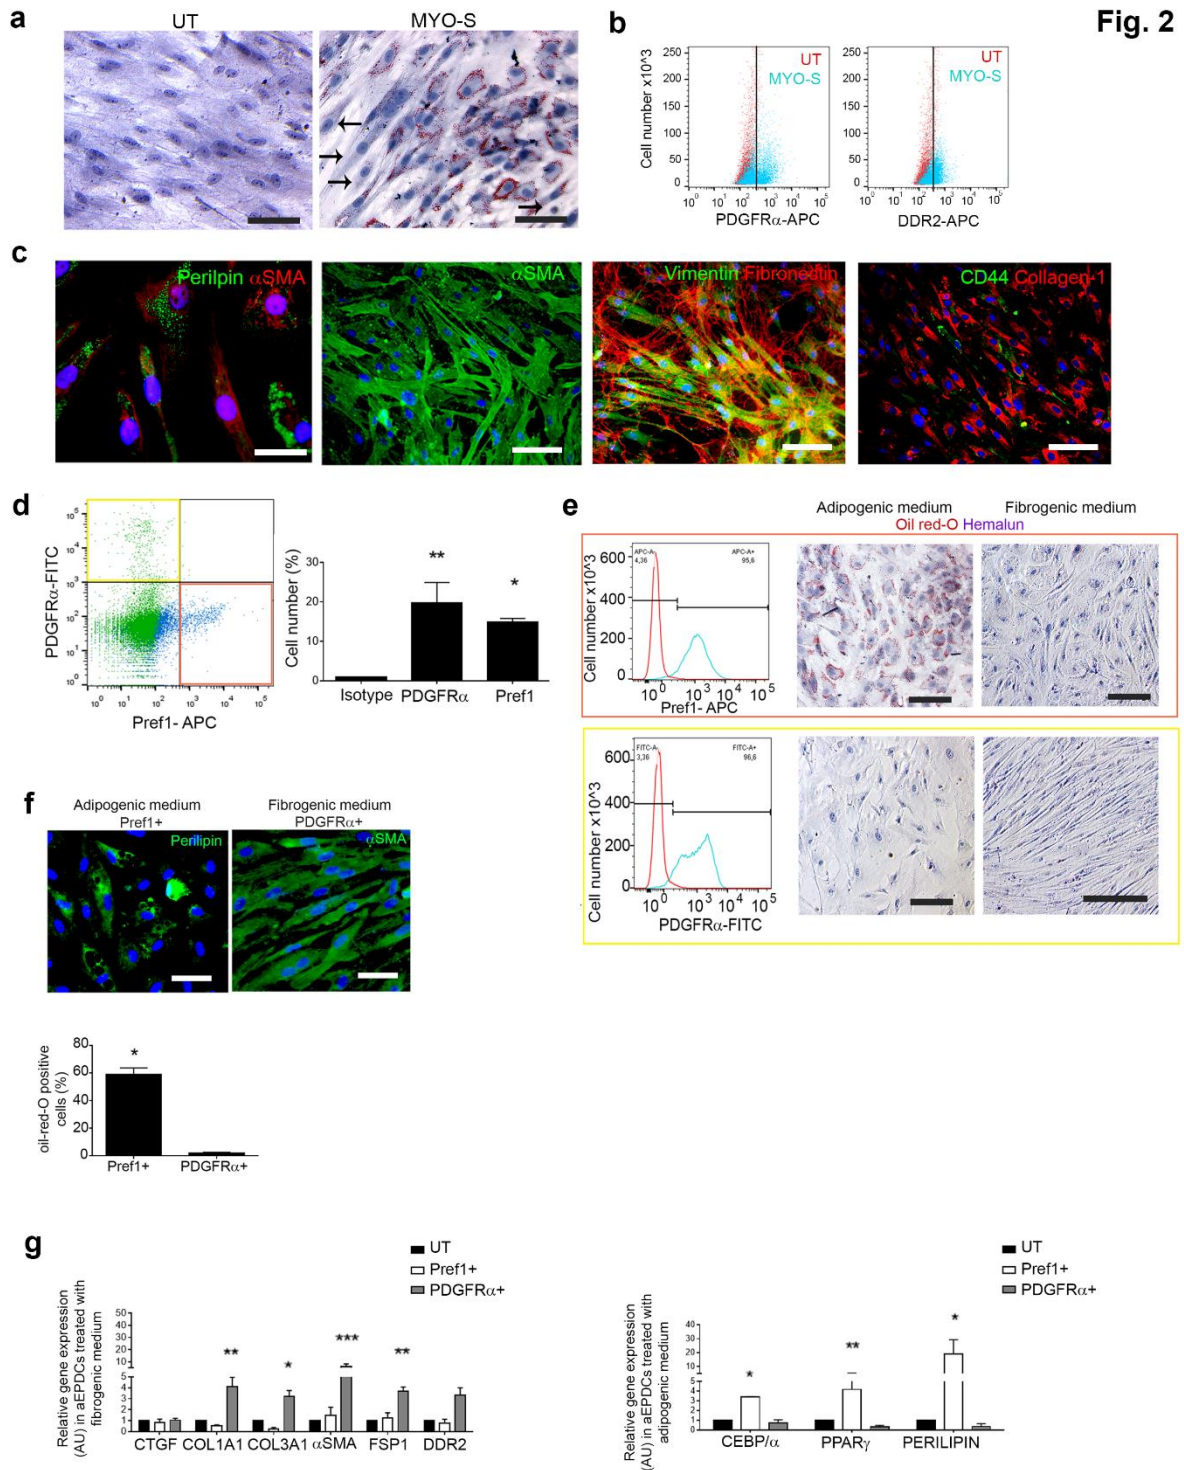

**Fig. 2** Fibrogenic or adipogenic fates of aEPDCs. (a) Representative images of aEPDCs incubated with MYO-S stained in oil-red-O and counterstained with hematoxylin (n=10). Scale bar, 100  $\mu$ m. Black arrows indicate elongated shape cells. (b) Flow cytometry analysis of aEPDCs treated with MYO-S (n=10). (c) Immunofluorescence staining in aEPDCs treated with MYO-S for Perilipin,  $\alpha$ SMA, Vimentin, Fibronectin, CD44 and Collagen-1. Scale bars, 100  $\mu$ m, 50  $\mu$ m. (d) Analysis of PDGFR $\alpha$  and Pref1 expression in aEPDCs by flow cytometry (n=10). (e) Representative images and histogram of sorted PDGFR $\alpha$ + or Pref1+ aEPDCs incubated with adipogenic medium or fibrogenic medium and stained with oil-red-O and counterstained with hemalun (n=10). Scale bars, 100  $\mu$ m, 50  $\mu$ m. (f) Perilipin or  $\alpha$ SMA immunofluorescence staining of PDGFR $\alpha$ + or Pref1+ sorted aEPDCs cultured with adipogenic medium or fibrogenic medium. Scale bar, 50  $\mu$ m. (g) Transcript expression levels of adipogenic and fibrogenic markers in PDGFR $\alpha$ + or Pref1+ aEPDCs treated with fibrogenesis (left) or adipogenesis (right) medium.

1

2

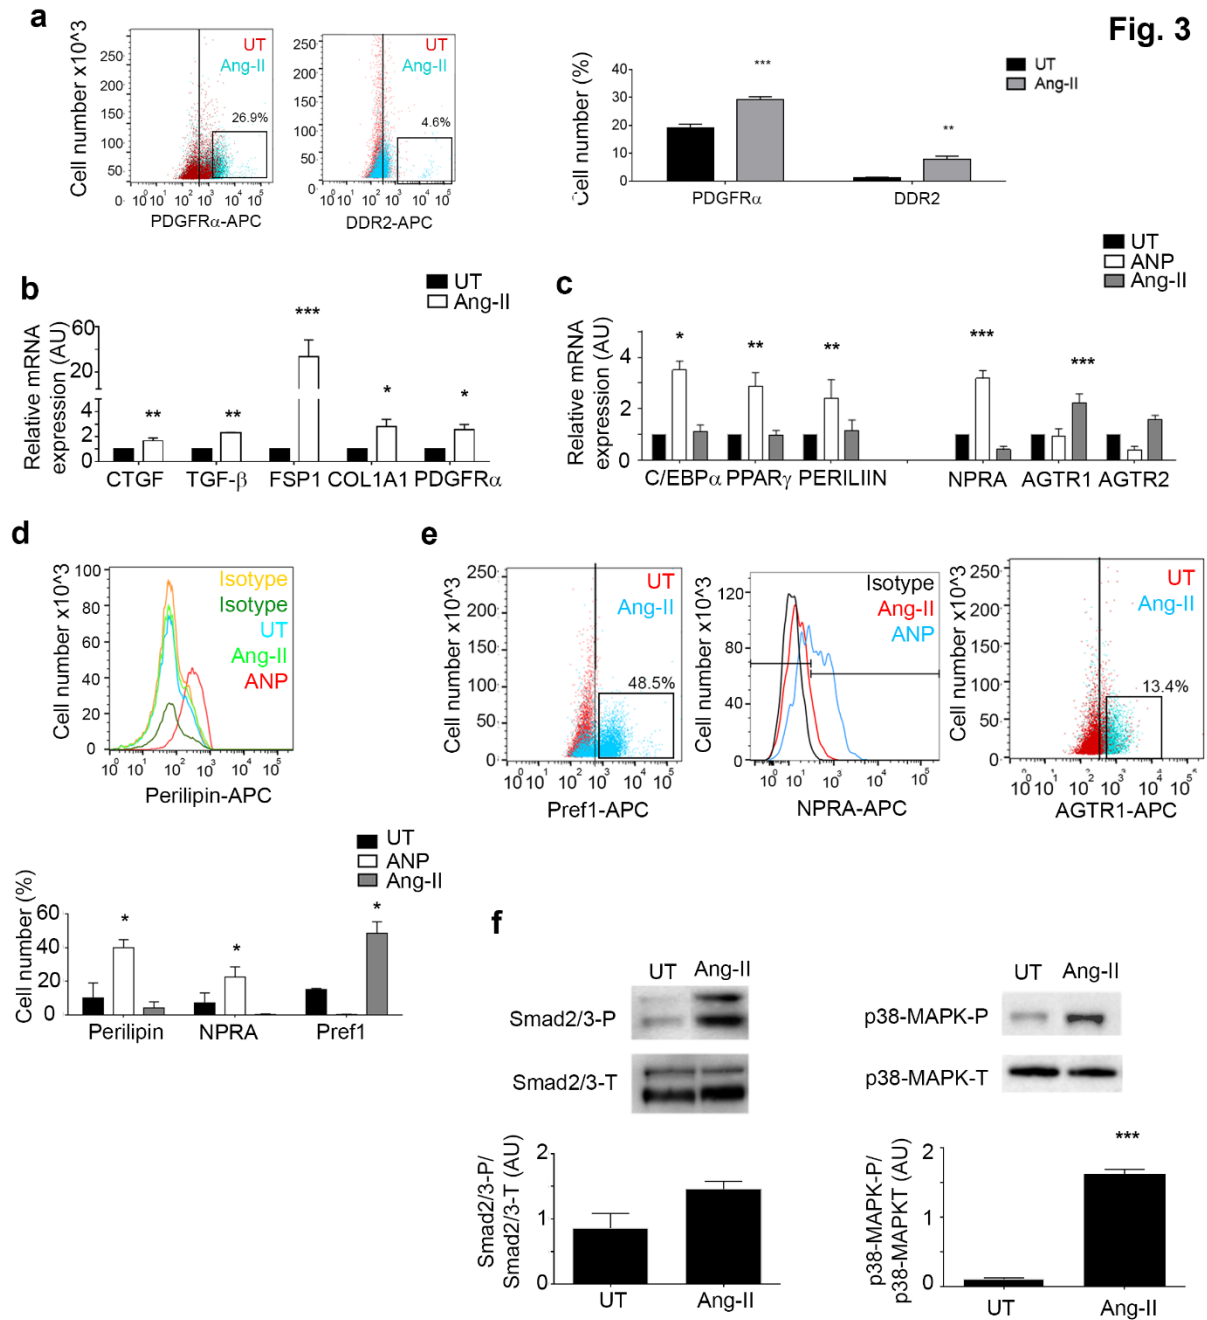

**Fig. 3 Angiotensin-II induces fibrogenic differentiation of aEPDCs.** (a) Flow cytometry and histogram analysis of aEPDCs treated with Ang-II (10 nM) for 7 days. Data are expressed as mean  $\pm$  SEM of independent experiments. \*,  $P < 0.05$ , \*\*,  $P < 0.01$ , \*\*\*  $P < 0.001$ , one-way ANOVA with Bonferroni's post hoc test. (b,c) Transcript expression levels of fibrogenic (b), adipogenic, ANP or Angiotensin-II receptors markers (c) in aEPDC treated with Ang-II (10 nM) (b,c) or ANP (10 pM) for 21 days (c). (d,e) Flow cytometry analysis and quantification of aEPDCs treated with Ang-II (10 nM) or ANP (10 pM). (f) Immunoblots and relative quantification of Smad2/3 or p38-MAPK signaling pathways in aEPDCs treated with Ang-II (10 nM) for 21 days. Data are expressed as mean  $\pm$  SEM of  $n=4$  independent experiments. \*,  $P < 0.05$ , \*\*,  $P < 0.01$ , \*\*\*  $P < 0.001$ , one-way ANOVA with Bonferroni's post hoc test.

1

2

**Fig. 4**

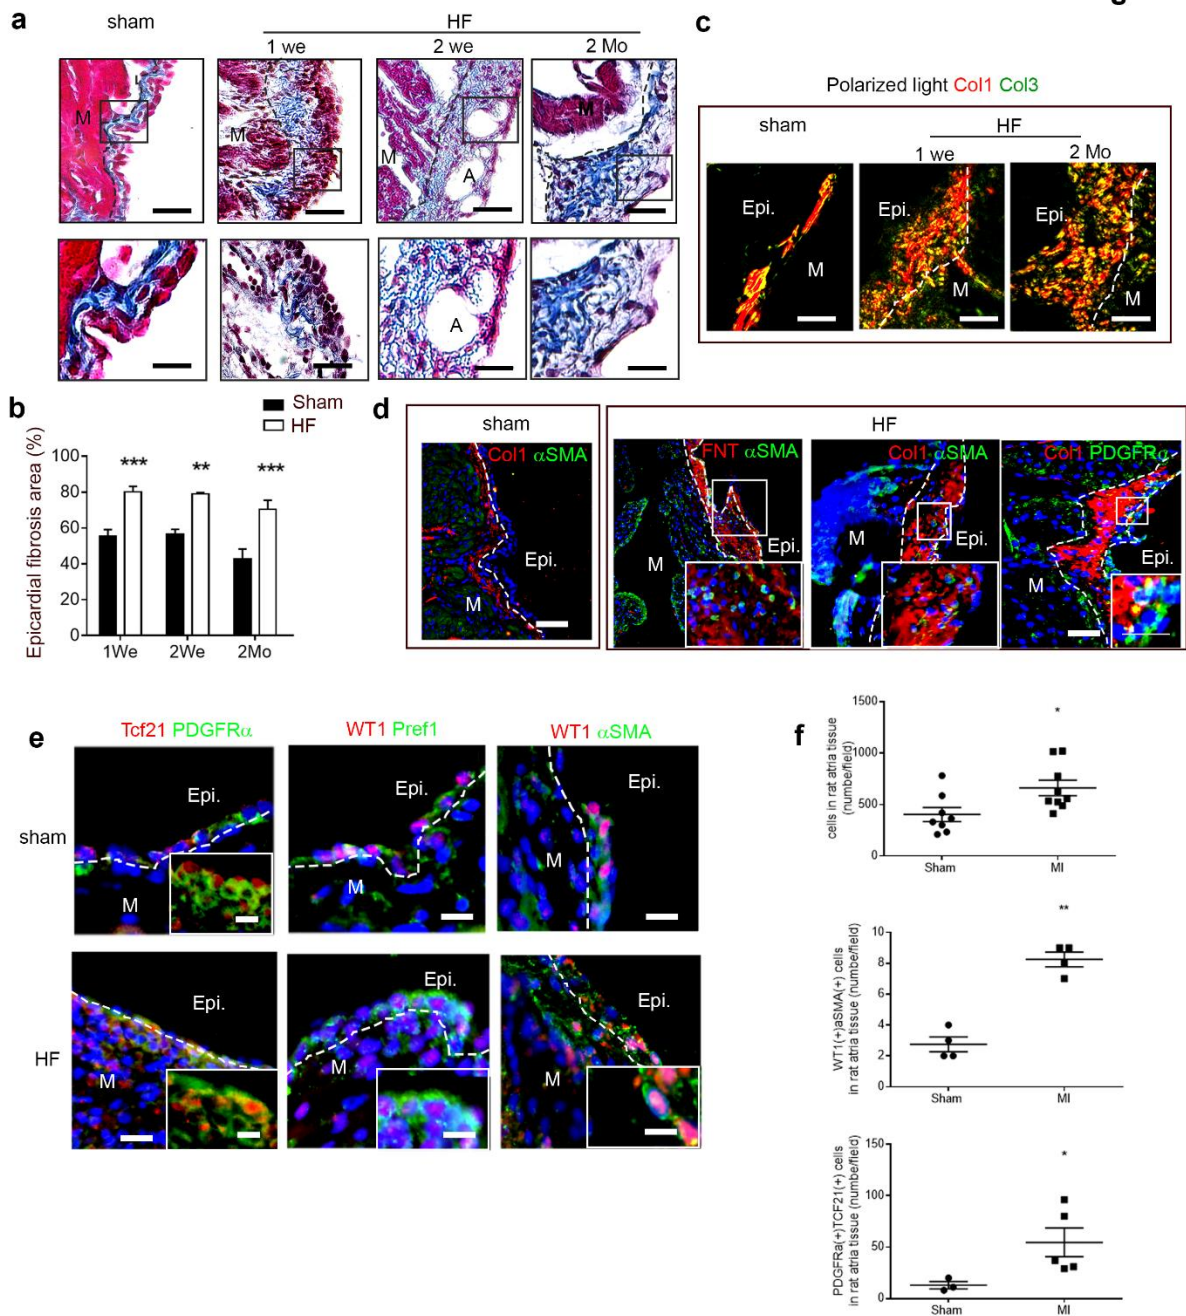

**Fig. 4 Epicardium remodeling is an early event during atrial remodeling in rat model of heart failure.** (a) Masson's trichrome staining of 7- $\mu$ m-thick sections of rat atrial tissue at 1 week, 2 weeks or 2 months post-MI and Sham (n=5, each group) observed by transmitted light microscopy. Scale bar, 50  $\mu$ m, 25  $\mu$ m. (b) Histomorphometry assay quantification in rat atrial tissue post-MI (n=5, each group) and Sham (n=5, each group). Data are expressed as the mean  $\pm$  SEM of independent experiments. \*\*, P < 0.01, \*\*\* P < 0.001, one-way ANOVA and Bonferroni's post hoc test. (c) PicroSirius red of 7- $\mu$ m-thick sections of rat atrial tissue at 1 week or 2 months post-MI and Sham (n=3, each group) is observed under polarized light microscopy, collagen-1 (Col1, red-yellow), collagen-3 (Col3, green). Scale bar, 60  $\mu$ m. (d,e) Immunofluorescence staining in rat atrial tissue sections at 2 months (d), 1 week post-MI (e) or Sham for Col1,  $\alpha$ SMA, PDGFR $\alpha$  (d,e), fibronectin (FNT) (d), WT1, Pref1 and Tcf21 (e). Scale bar, 200  $\mu$ m, 100  $\mu$ m, 50  $\mu$ m. (f) Plots represent number of total cells (top), WT1+ cells (middle) or PDGFR $\alpha$ + cells in atria epicardium in sham or MI rat model. Data are expressed as the mean  $\pm$  SEM of independent experiments. \*P < 0.05, \*\* P < 0.01 unpaired t test. Epi., epicardium; A, adipocytes; M, Myocytes.

1

2

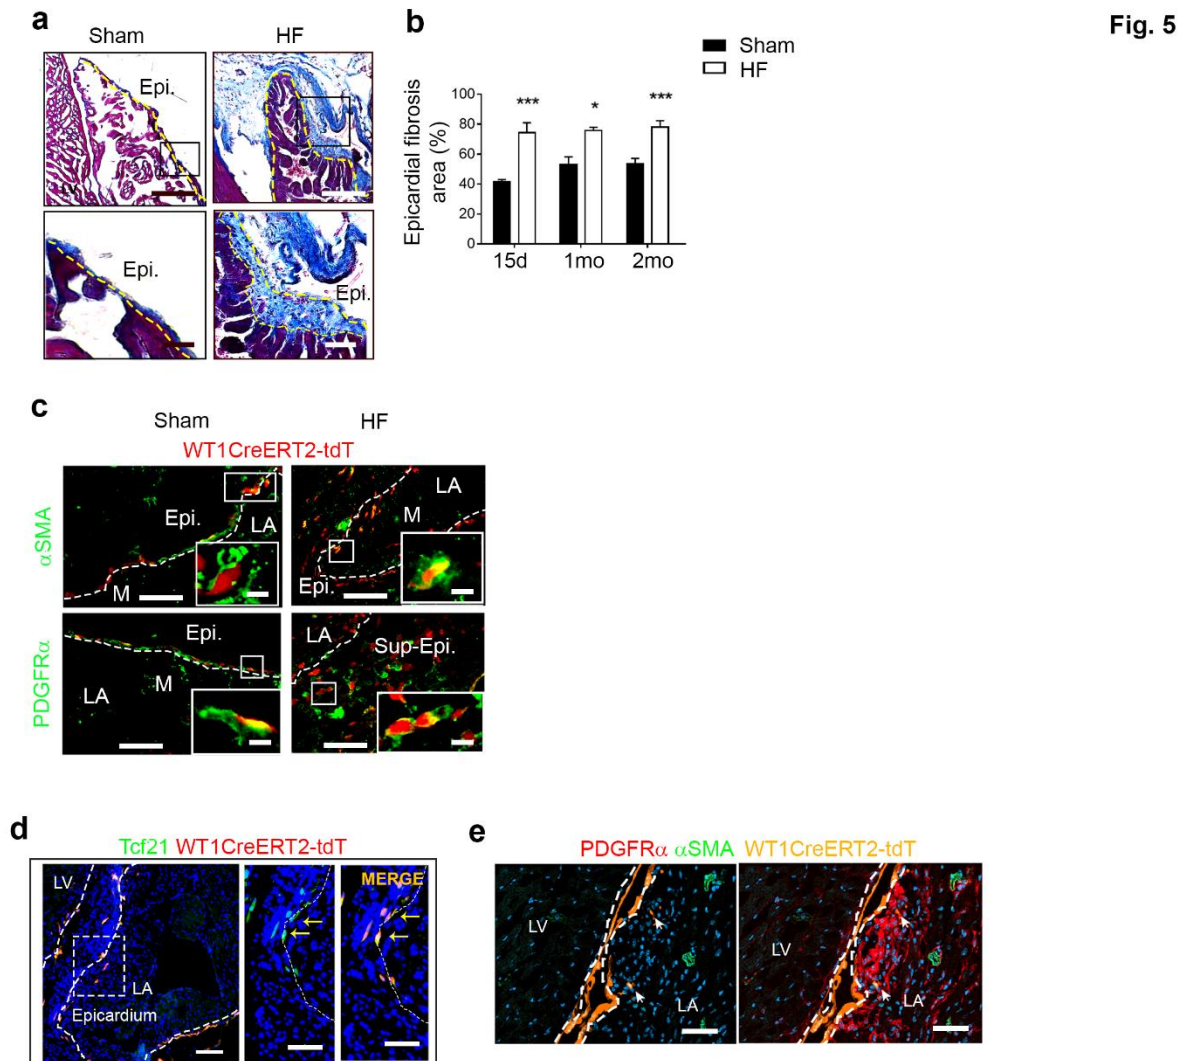

**Fig. 5 Epicardium is a source of fibroblasts during atrial remodeling in mouse model of heart failure.** (a) Masson's tri-chrome staining of 7- $\mu$ m-thick sections of WT1CreERT2<sup>+/-</sup>/Rosa-tdT<sup>+/-</sup> mouse atrial tissue at 2 months post-MI or Sham (n=5, each group). Scale bar, 200  $\mu$ m, 100  $\mu$ m. (b) Histomorphometry assay quantification in WT1CreERT2<sup>+/-</sup>/Rosa-tdT<sup>+/-</sup> mice atrial tissue at 15 days, 1 months or 2 months post-MI (n=5) or Sham (n=5). (c-e) Immunofluorescence staining of WT1CreERT2<sup>+/-</sup>/Rosa-tdT<sup>+/-</sup> mice atrial tissue sections at 2 months post-MI (n=3) or Sham (n=3) for  $\alpha$ SMA or PDGFR $\alpha$  (c,e), Tcf21 (d). Scale bar, 200  $\mu$ m, 100  $\mu$ m, 50  $\mu$ m. Data are expressed as the mean  $\pm$  SEM of independent experiments. \*, P < 0.05, \*\*\* P < 0.001, one-way ANOVA and Bonferroni's post hoc test. Epi., epicardium; Sup-Epi., sup-epicardium; LV, left ventricle; LA, left atria.

1

2

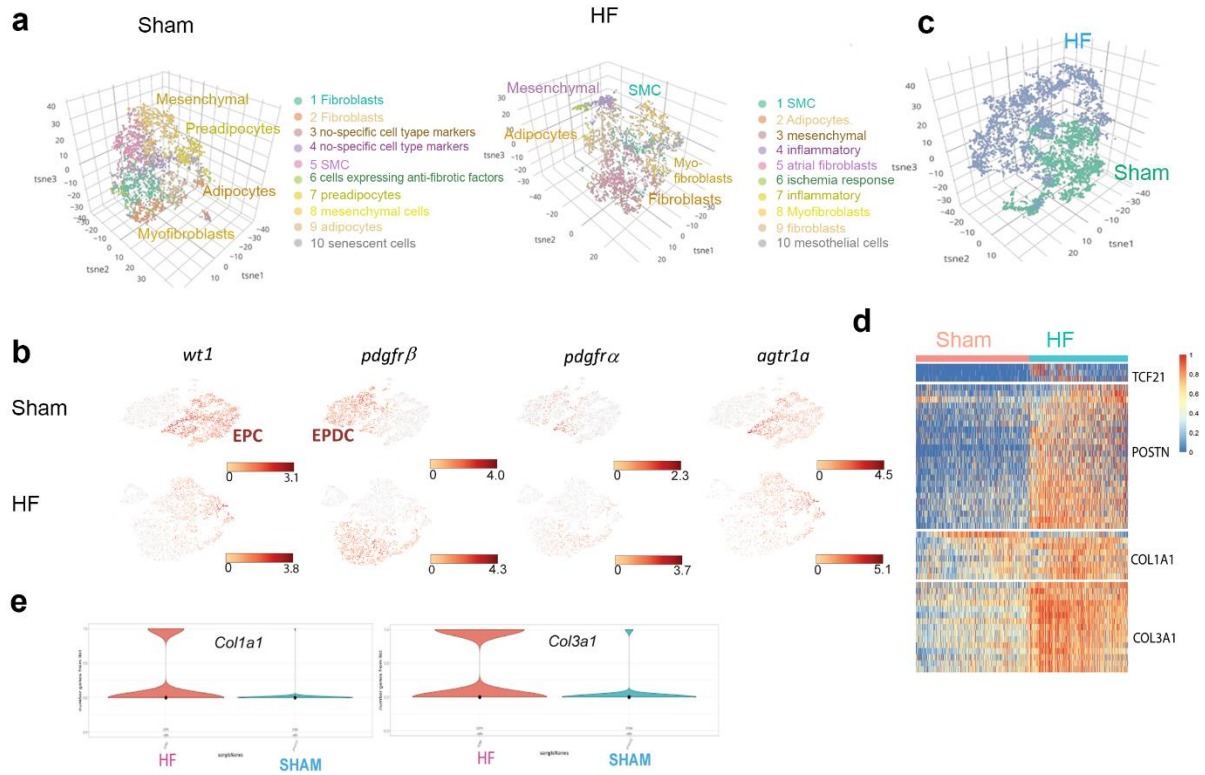

**Fig. 6 Differential transcriptional signatures aEPDCs at a single cell level between sham and diseased atria. (a)** 3D Tsn Plots of sham and heart failure (HF) rat aEPDCs. **(b)** Tsn plots of sham or diseased (HF) epicardial (EPC) and adult epicardial-derived (aEPDCs) cells for the four genes (WT1, PDGFR $\beta$ , PDGFR $\alpha$ , and AGTR1 $\alpha$ ). **(c)** 3D tsn plot of sham and HF rat aEPDCs. **(d)** Heatmap of the sham and HF aEPDCs expressing TCF21, POSTN, COL1a1 and COL3a1. **(e)** Violin plots of COL1a1 and COL3a1 expressing cells in sham and HF aEPDCs.

1

2

a

Fig. 7

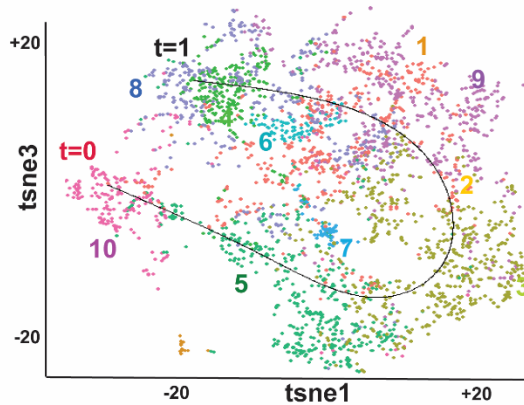

b

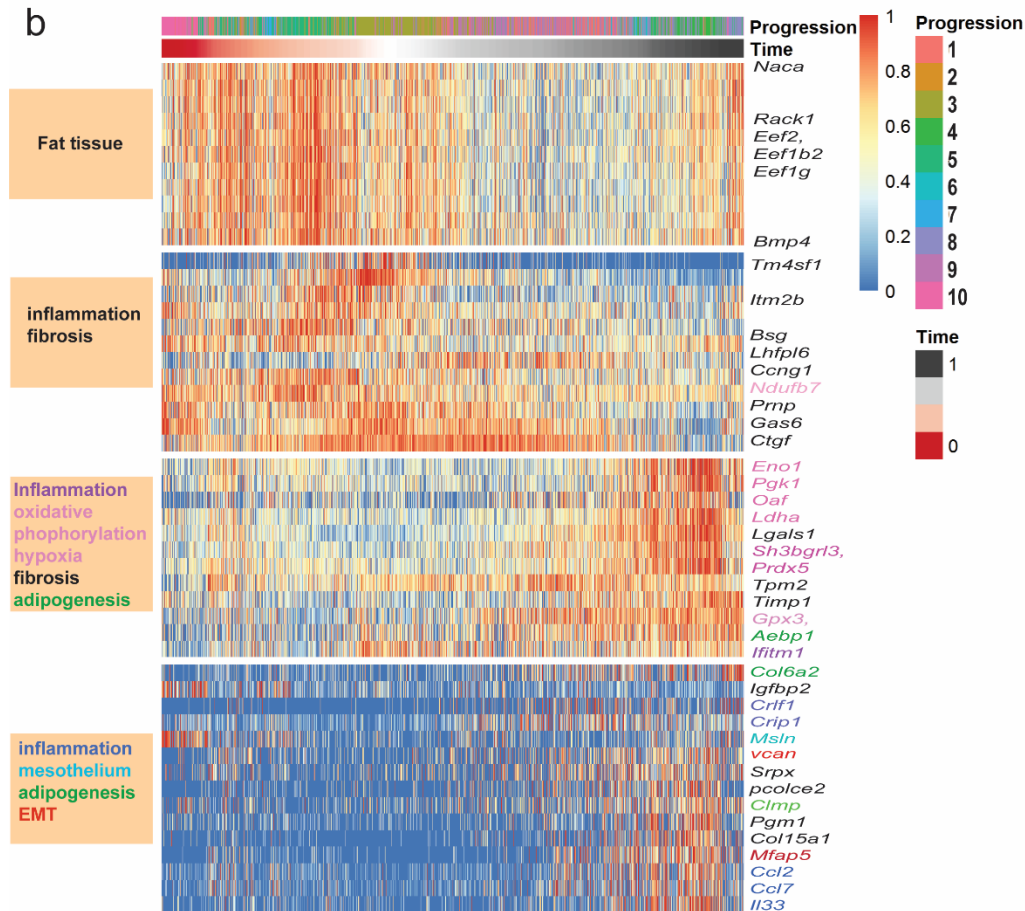

**Fig. 7: Single cell analysis of aEPDCs trajectory during atrial remodeling in rat model of heart failure (HF).** (a) Tsne inference trajectory of cells within the diseased aEPDC clusters (Scorpius algorithm). Clusters are numbered as Fig.6a (HF). The pseudo-temporal ordering computational method allowed to track the fatty-fibrosis transition of cells together with an inflammatory process. (b) Heatmap of Inference trajectory of cells within the HF aEPDC (Scorpius algorithm). Genes are indicated on the right and colored according to the biological process indicated on the left boxes. Lines without genes (module 1) are genes without names just annotated in Ensembl (<http://www.ensembl.org/index.html>).

1

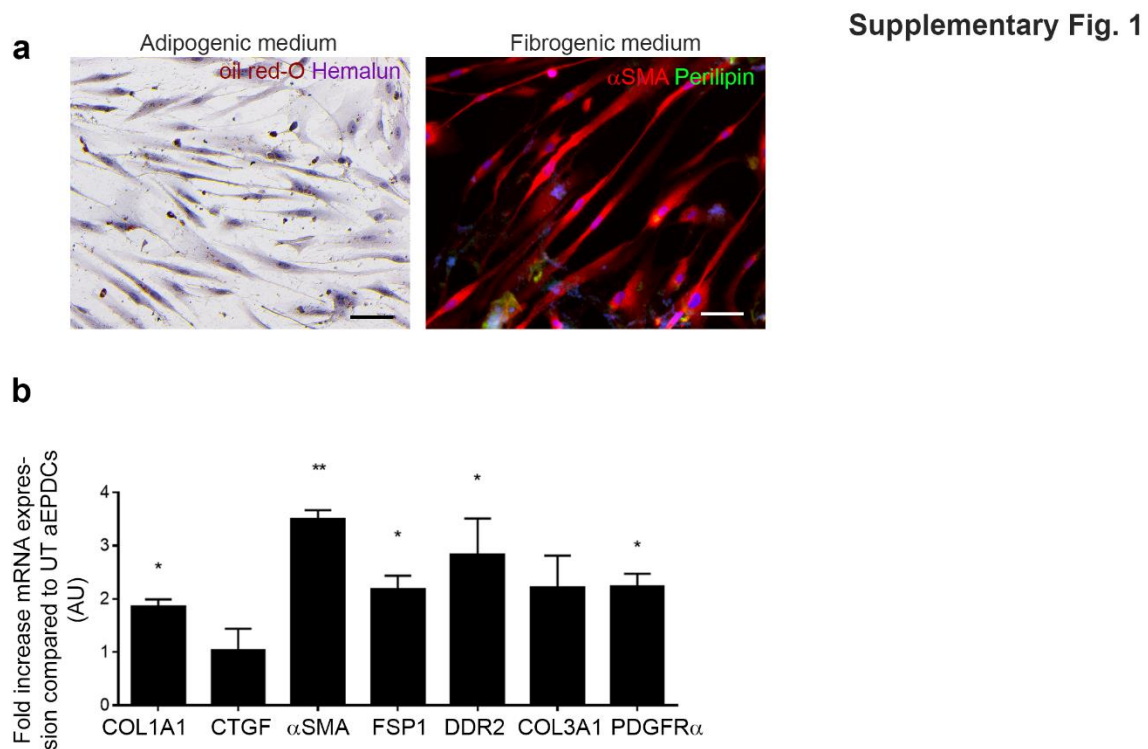

**Supplementary Fig. 1 Fibrogenic peptides are released in human MYO-S.** (a) Representative images of aEPDCs treated with TGF- $\beta$  (10  $\mu$ M) for 7 days and stained with oil-red-O and counterstained with hemalun or immuno-labeled for perilipin or  $\alpha$ SMA (n=5). Scale bar, 100  $\mu$ m. (b) Expression of fibrogenic genes in aEPDCs treated with TGF- $\beta$  (10  $\mu$ M) for 7 days compared to untreated (UT) control. Data are expressed as the mean  $\pm$  SEM of n=3 independent experiments. \*, P < 0.05, \*\*, P < 0.01, one-way ANOVA with Bonferroni's post hoc test.

2

3



Supplementary Fig. 2

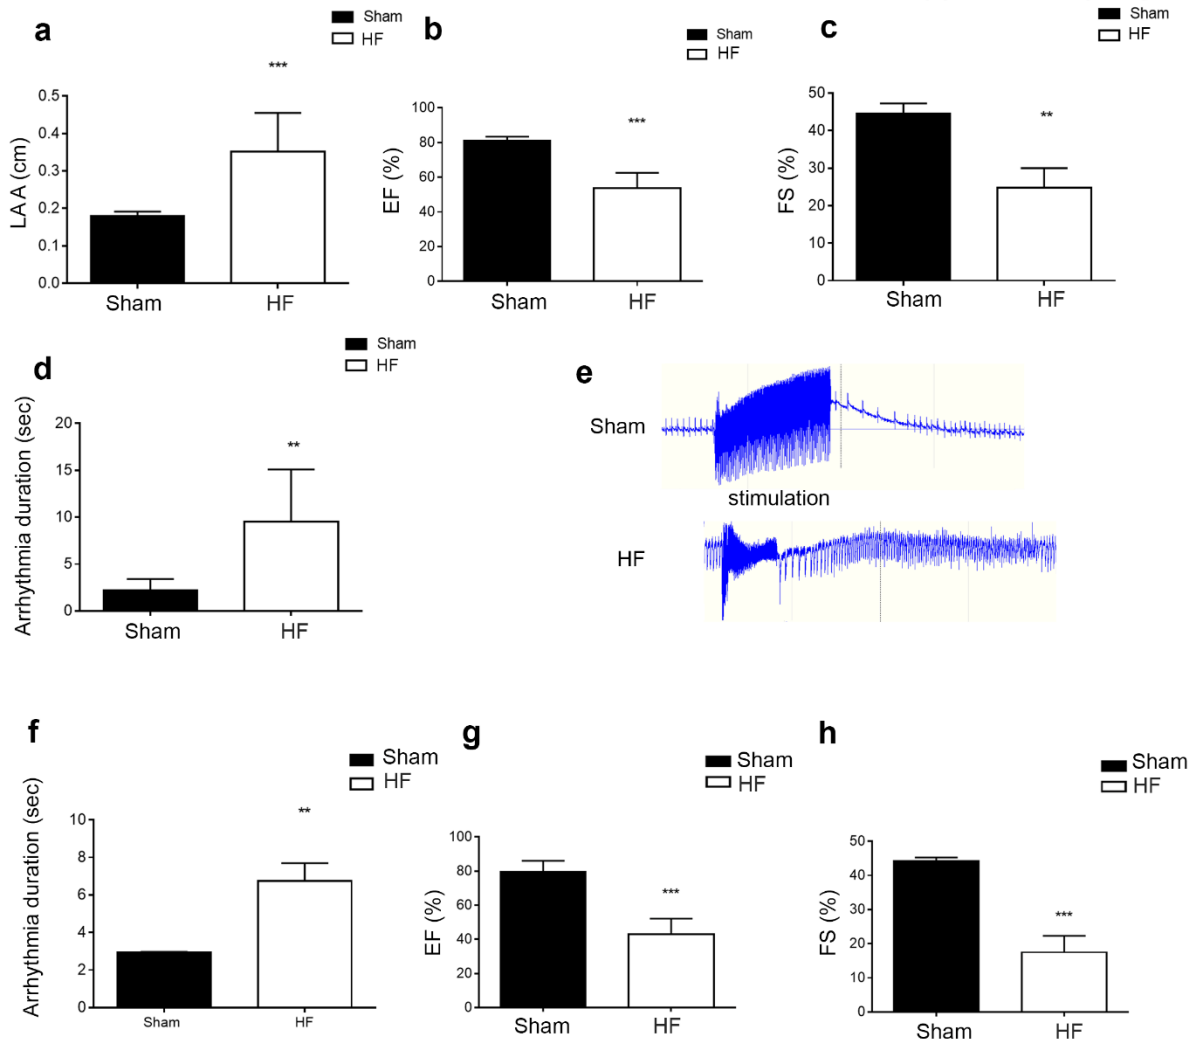

**Supplementary Fig. 2 Vulnerability of AF in rat or mouse model of HF.** In rat 2-months post-MI (n=34) or sham (n=12) (a-e) or in mouse 2-months post-MI (n=6) or sham (n=10) (f-h), histograms represent left atria area (LAA) (A), ejection fraction (EF) (b,g), fractional shortening (FS) (c,h) or arrhythmia duration (d,f). Data are expressed as the mean ± SEM of independent experiments. \*\*, P < 0.01, \*\*\* P < 0.001, unpaired Student's t test. (e) Paroxysmal atrial fibrillation episodes in rats 2-months post-HF.

1

2

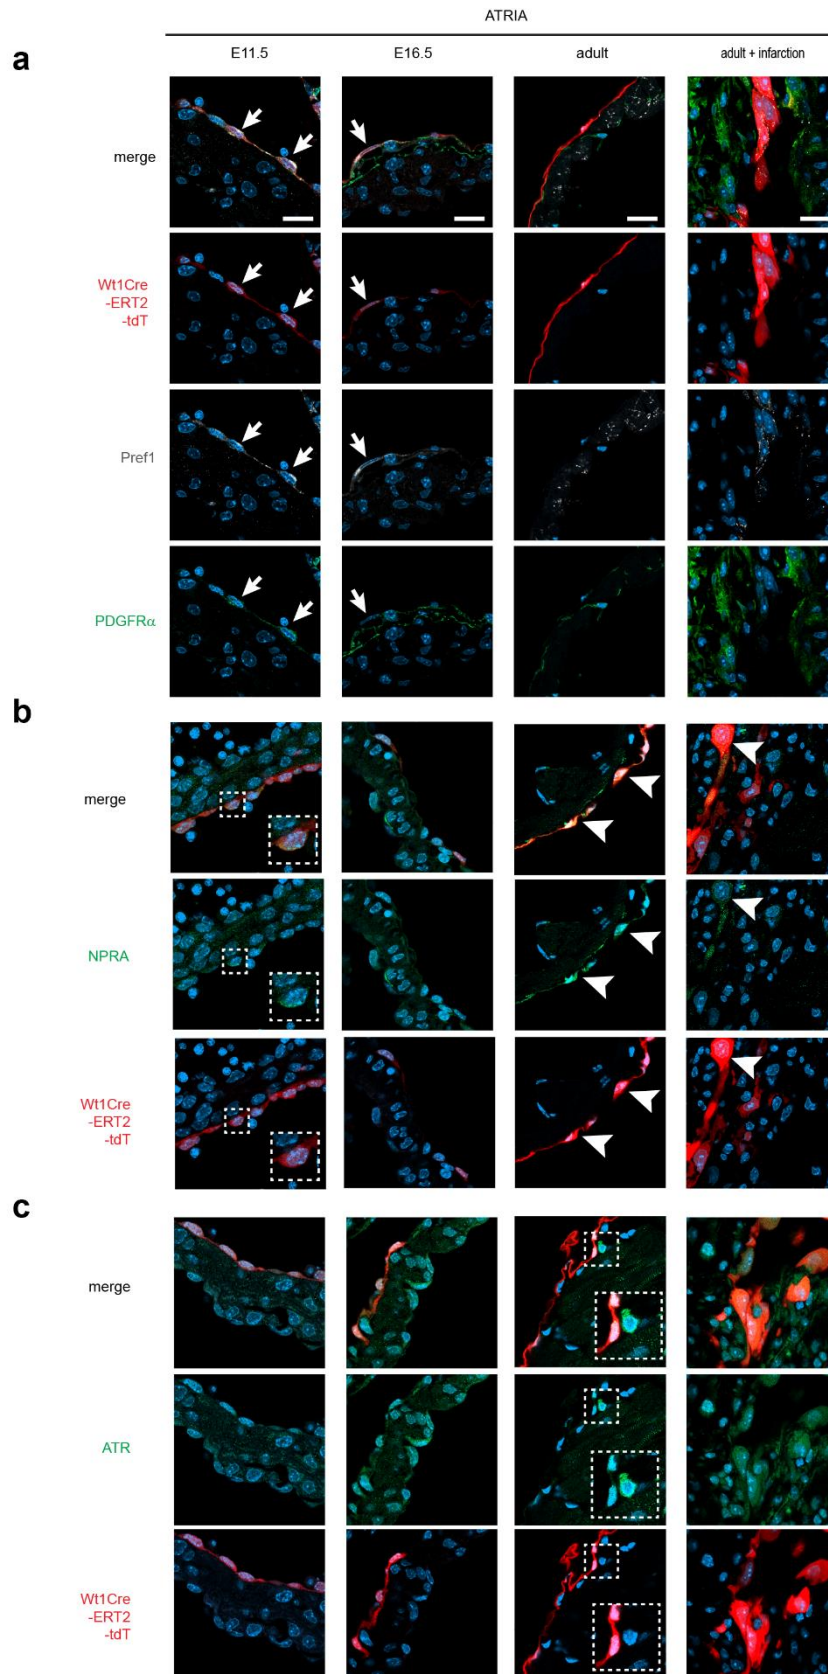

**Supplementary Fig. 3 Heterogeneity of atria epicardium in mouse model of atrial remodeling associated with HF.** Representative images of heterogeneity of Pref1 and PDGFR $\alpha$  (a), NPRA (b) or ATR1 (c) expression in E11.5, E16.5, adult sham or HF atrial epicardium (a), Scale Bar, 10 $\mu$ m, 50  $\mu$ m

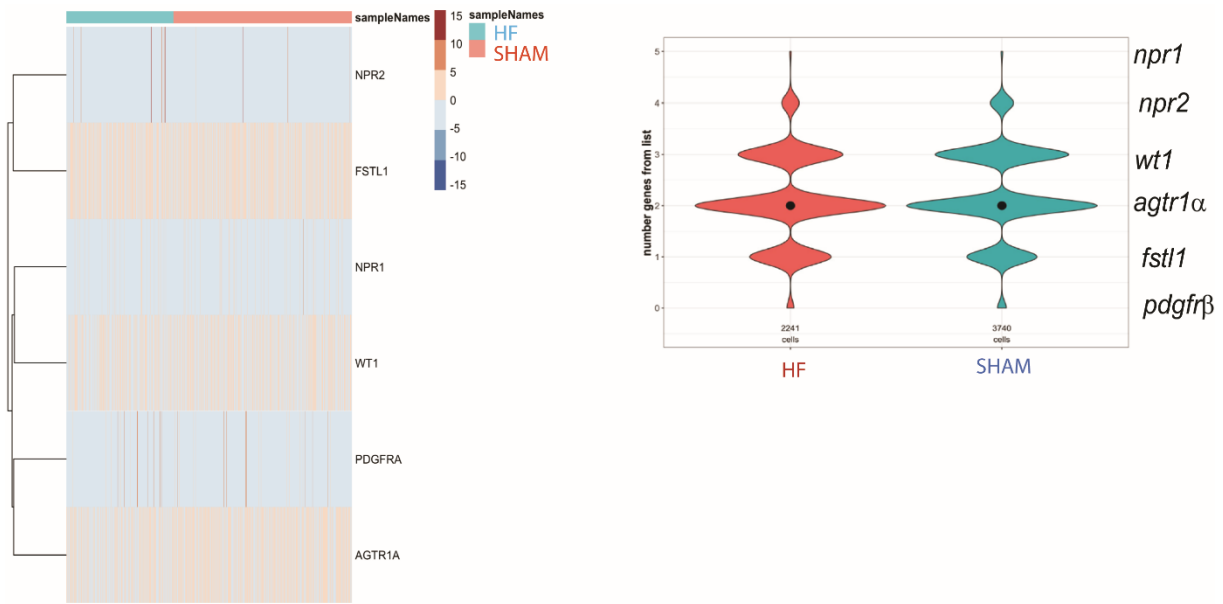

**Supplementary Fig. 4 Gene profile of rat epicardial cells from healthy (Sham) and diseased (HF).** Left panel: Heat map of epicardium specific genes in both sham and HF dataset. Right panel: co-expression violin plot of 5 genes in both sham and HF dataset.

1

2

## Supplementary Fig. 5

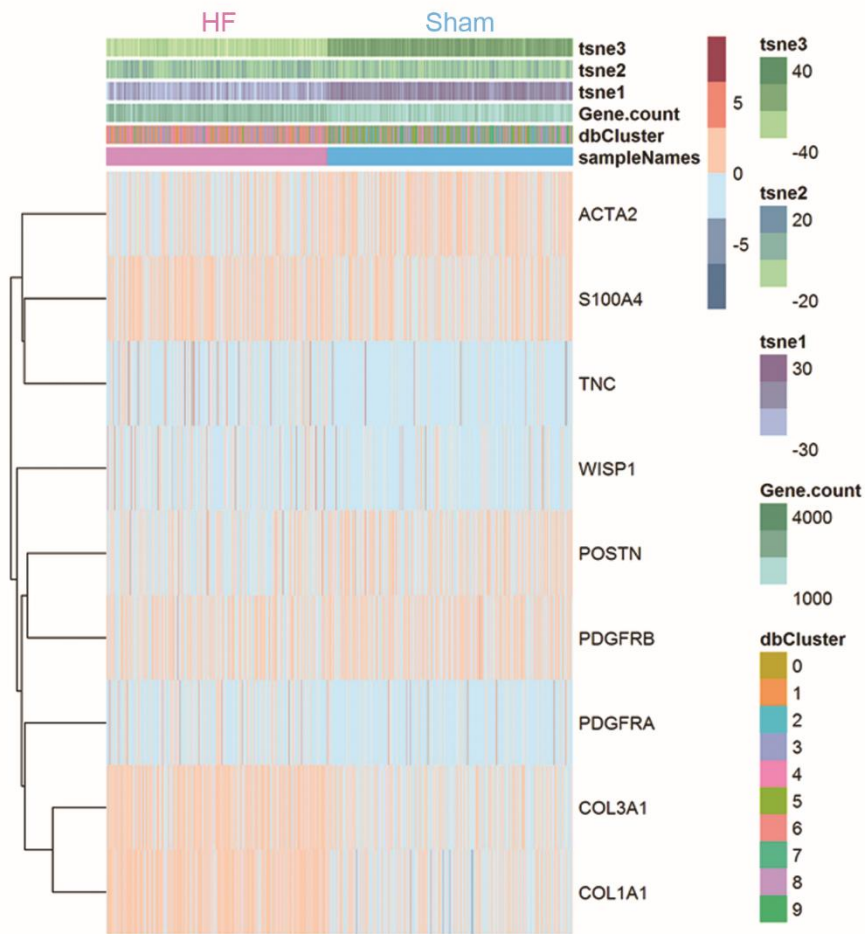

**Supplementary Fig. 5** Heat map of fibrotic genes in healthy and diseased (HF) rat atria aEPDCs.

Supplementary Fig. 6

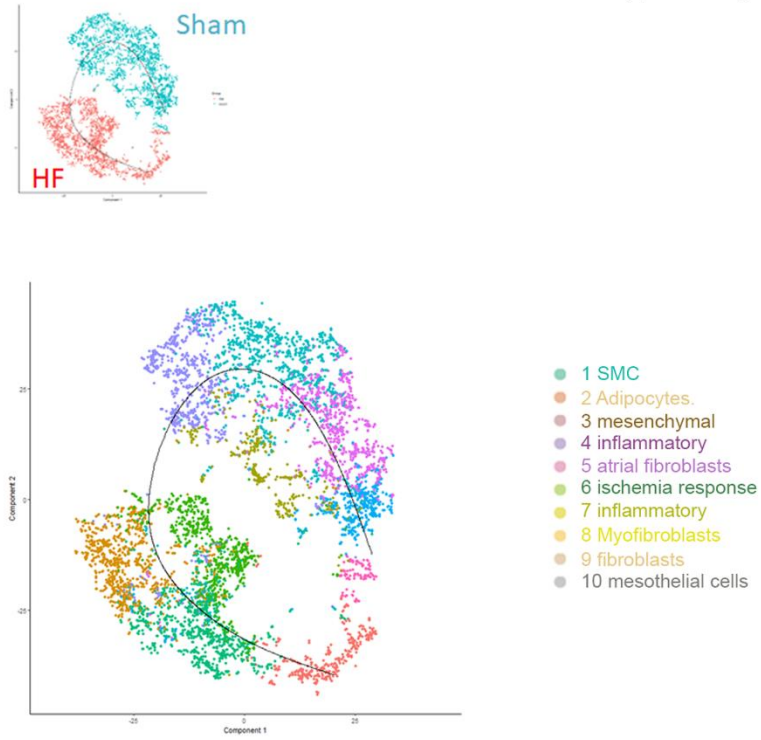

Supplementary Fig.6 Trajectory from healthy (Sham) to diseased (HF) rat atria aEPDCs.

1

2

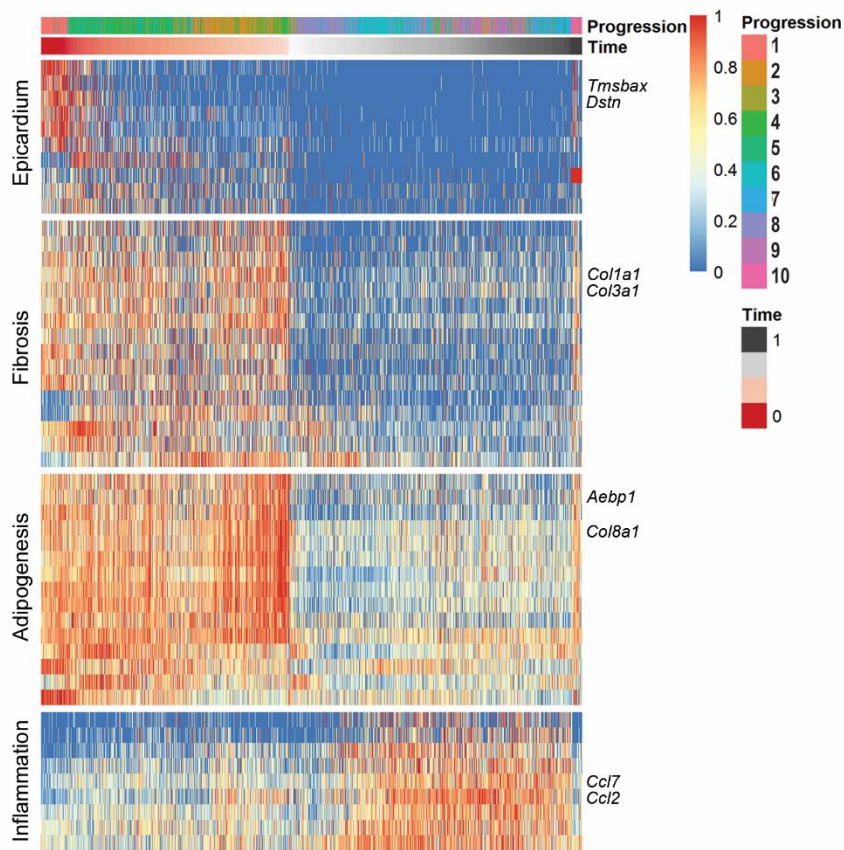

**Supplementary Fig. 7** Trajectory inference heat map of disease in both healthy (Sham) and disease (HF) rat aEPDCs. Data are analyzed with SCORPIUS logarithm.

1

2

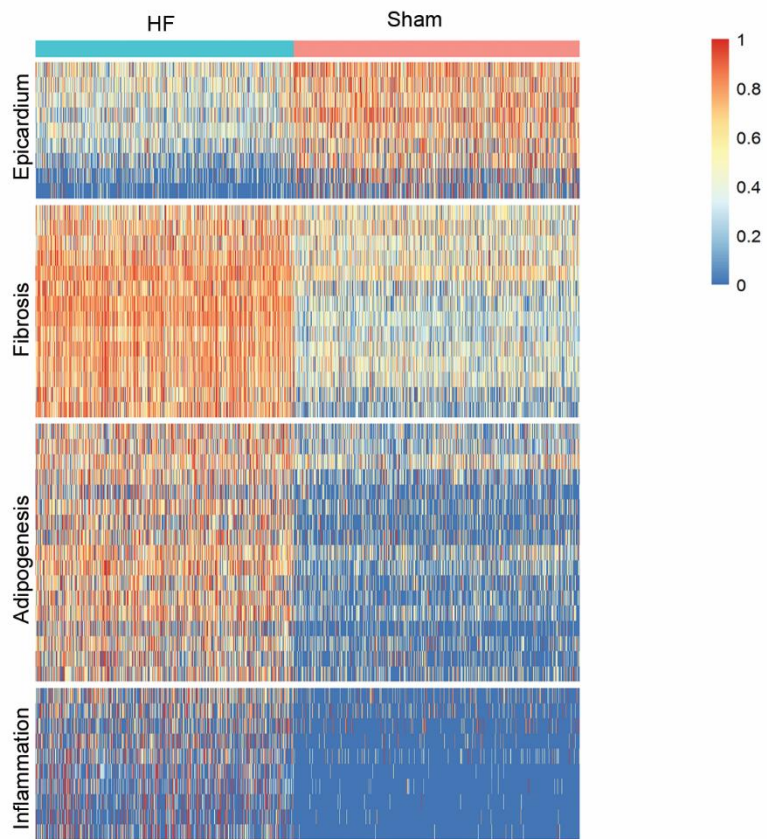

**Supplementary Fig. 8** Heat map of adipogenic and fibrotic genes expression in both healthy and diseased (HF) rat atria aEPDCs. Data are analysed with SCORPIUS.

1

2

3

4

5

6

1 Supplementary Table 1. Clinical parameters of patients

| Clinical outcomes for                  | Histology    | EPDCs          | Secretome      |
|----------------------------------------|--------------|----------------|----------------|
| Number of subjects, n                  | 109          | 15             | 10             |
| Age, y (mean $\pm$ SD)                 | 69 $\pm$ 8.5 | 67 $\pm$ 9     | 66 $\pm$ 6     |
| Sex, M/F                               | 64/45        | 8/7            | 2/8            |
| BMI, kg/m <sup>2</sup> (mean $\pm$ SD) | 26 $\pm$ 3   | 25.5 $\pm$ 4.2 | 27.3 $\pm$ 1.2 |
| AF                                     | 31           | 4              | 3              |
| LVEF <50%, n                           | 84           | 2              | 2              |
| Coronary bypass, n                     | 41           | 7              | 6              |
| VMR, n                                 | 20           | 8              | 4              |

2 BMI, body mass index; LVEF, left ventricular ejection fraction; AF, Atrial fibrillation;  
 3 VMRMitral valve replacement

4

5

6

7 Supplement Table 2. Taqman Human gene probes

8

| Gene           | Assay ID      |
|----------------|---------------|
| Colla1         | HS00164004_m1 |
| Col3a1         | Hs00943809_m1 |
| TGF $\beta$    | HS00998133_m1 |
| PDGFR $\alpha$ | HS01001343_g1 |
| ACTA1          | Hs05032285_s1 |
| CTGF           | Hs01026927_g1 |
| FSP1           | Hs00243202_m1 |
| C/EBP $\alpha$ | Hs00269972_s1 |
| PPAR $\gamma$  | Hs01115513_m1 |
| Perilipin      | Hs00160173_m1 |
| NPRA           | Hs01099745_m1 |
| AGTR1          | Hs00258938_m1 |
| AGTR2          | Hs02621316_s1 |
| GAPDH          | Hs02758991_g1 |

9

10

11



1 Supplementary Table 3. (a) Cell number per field in human atrial tissue

| Cells, (n)                | Mean $\pm$ SEM  | Percent (%)    | <i>P value</i> |
|---------------------------|-----------------|----------------|----------------|
| Dapi                      | 306 $\pm$ 120.9 | 100            | -              |
| WT1(+)                    | 46 $\pm$ 19.5   | 15 $\pm$ 2     | P<0.0001       |
| PDGFR $\alpha$ (+)        | 44 $\pm$ 12     | 10.3 $\pm$ 2.1 | P<0.0001       |
| $\alpha$ SMA(+)           | 15 $\pm$ 4.5    | 8.4 $\pm$ 1.1  | P<0.0001       |
| PDGFR $\alpha$ (+)WT1(+)  | 25 $\pm$ 11     | 8.4 $\pm$ 0.4  | P=0.0579       |
| $\alpha$ SMA(+)<br>WT1(+) | 9 $\pm$ 5       | 3.1 $\pm$ 0.1  | P=0.103        |

10

11

12 (b) Cell number per field in rat atrial tissue

13

| Cells, (n) Mean $\pm$ SEM  | MI            | Sham          | <i>P value</i> |
|----------------------------|---------------|---------------|----------------|
| Dapi                       | 804 $\pm$ 237 | 580 $\pm$ 205 | P<0.05         |
| WT1(+)                     | 80 $\pm$ 26   | 31 $\pm$ 9    | P<0.05         |
| PDGFR $\alpha$ (+)         | 100 $\pm$ 29  | 26 $\pm$ 8    | P<0.05         |
| TCF21(+)                   | 150 $\pm$ 40  | 74 $\pm$ 31   | P=0.0714       |
| Pref-1(+)                  | 11 $\pm$ 2    | 17 $\pm$ 6    | P=0.2460       |
| PDGFR $\alpha$ (+)TCF21(+) | 55 $\pm$ 17   | 13 $\pm$ 5    | P<0.05         |
| Pref-1(+)<br>WT1(+)        | 11 $\pm$ 2    | 15 $\pm$ 6    | P=0.5317       |

14

15

16

17

18

19

20

21

22

23

24

25

1  
2  
3

Supplementary Table 4. Association of biological parameters with clinical outcomes

|          | Adipose tissue/<br>Epicardial Fibrosis |                     |         |
|----------|----------------------------------------|---------------------|---------|
|          | LVEF<50                                | LVEF>50             | P value |
| age (ye) |                                        |                     |         |
| < 70     | 0.52                                   | 0.55                | 0.8289  |
| ≥ 70     | 2.53                                   | 0.59                | 0.0389  |
|          | VMR <sup>-</sup>                       | VMR <sup>+</sup>    | P value |
| age (ye) |                                        |                     |         |
| < 70     | 0.48                                   | 0.75                | 0.595   |
| ≥ 70     | 0.84                                   | 0.33                | 0.0425  |
|          | Bypass <sup>-</sup>                    | Bypass <sup>+</sup> | P value |
| age (ye) |                                        |                     |         |
| < 70     | 0.96                                   | 0.47                | 0.323   |
| ≥ 70     | 0.44                                   | 0.96                | 0.219   |
|          | AF <sup>-</sup>                        | AF <sup>+</sup>     | P value |
| age (ye) |                                        |                     |         |
| < 70     | 0.59                                   | 0.19                | 0.764   |
| ≥ 70     | 0.86                                   | 0.32                | 0.2119  |

4  
5  
6

LVEF, left ventricular ejection fraction; AF, Atrial fibrillation; VMR, Mitral valve replacement; (ye), years
